# Supplementary material for: Doubly N-confused isophlorin: synthesis, structure and copper coordination
Source: Royal Society of Chemistry journal article supplement (doi:10.1039/c4cc06259k), 2014-09-23
Supplement: c4cc06259k1.pdf [file c4cc06259k1.pdf]

## Electronic Supplementary Information

for

### **Doubly N-confused isophlorin: Synthesis, structure and copper coordination**

Jiaying Yan, Makoto Takakusaki, Yufeng Yang, Shigeki Mori, Bao Zhang,  
Yaqing Feng,\* Masatoshi Ishida and Hiroyuki Furuta\*

#### **Table of Contents**

|                                                                                                               |         |
|---------------------------------------------------------------------------------------------------------------|---------|
| <b>Experimental general</b> .....                                                                             | S2      |
| <b>Preparation of 2, 3, 4-Cu</b> .....                                                                        | S2–S3   |
| <b>Fig. S1:</b> HPLC charts for <b>2, 3, 4-Cu</b> .....                                                       | S4      |
| <b>Fig. S2–S10:</b> <sup>1</sup> H, <sup>19</sup> F, <sup>13</sup> C-NMR spectra of <b>2, 3, 4-Cu</b> .....   | S5–S9   |
| <b>Fig. S11:</b> <sup>1</sup> H NMR spectral changes of <b>2</b> upon addition of D <sub>2</sub> O .....      | S9      |
| <b>Fig. S12–S13:</b> <sup>1</sup> H- <sup>1</sup> H COSY spectra of <b>2, 4-Cu</b> in CDCl <sub>3</sub> ..... | S10     |
| <b>Fig. S14:</b> UV/vis absorption spectrum of <b>4-Cu</b> in CH <sub>2</sub> Cl <sub>2</sub> .....           | S11     |
| <b>Fig. S15:</b> CV and DPV of <b>2, 3, 4-Cu</b> in CH <sub>2</sub> Cl <sub>2</sub> .....                     | S11     |
| <b>X-ray details:</b> .....                                                                                   | S12     |
| <b>Table S1:</b> Crystal data and structure analysis results for <b>2, 3, 4-Cu</b> .....                      | S13     |
| <b>Fig. S16–S17:</b> X-ray crystal structures of <b>2, 3</b> .....                                            | S14     |
| <b>Fig. S18–S19:</b> Selected bond lengths (Å) and C-N-C angles (deg) of <b>2, 3, 4-Cu</b> .....              | S15     |
| <b>Calculation details:</b> .....                                                                             | S16     |
| <b>Fig. S20:</b> Optimized structures of <b>2</b> and <b>3</b> obtained by DFT calculations .....             | S17     |
| <b>Table S2:</b> HOMA values calculated for <b>2, 3, 4-Cu</b> .....                                           | S17     |
| <b>Fig. S21:</b> NICS values (ppm) of <b>2, 3, 4-Cu</b> .....                                                 | S18     |
| <b>Fig. S22:</b> MO diagrams of <b>2, 3, 4-Cu</b> .....                                                       | S18     |
| <b>Fig. S23:</b> TD-DFT calculations for <b>2, 3, 4-Cu</b> .....                                              | S19     |
| <b>Cartesian coordinates for the optimized structures for 2, 3, 4-Cu</b> .....                                | S20–S28 |

## Experimental general

Commercially available solvents and reagents were used without further purification unless otherwise mentioned. Preparative separation was performed by silica gel column chromatography (KANTO Silica Gel 60 N, spherical, neutral, 63–210  $\mu\text{m}$ ). Analytical thin-layer chromatography (TLC) was performed on Merck silica gel 60 pre-coated aluminum sheets.  $^1\text{H}$ -NMR (300 or 600 MHz),  $^{19}\text{F}$ -NMR (564 MHz) and  $^{13}\text{C}$ -NMR (150 MHz) spectra were recorded on a JEOL JNM-AL 300 FT-NMR spectrometer and Bruker Avance III HD600SB spectrometer. Chemical shifts ( $\delta$ ) are reported in ppm relative to residual solvent and internal standard signals ( $\text{CDCl}_3$ : 7.26 ppm and  $\text{CD}_2\text{Cl}_2$ : 5.32 ppm for  $^1\text{H}$  and 53.8 ppm for  $^{13}\text{C}$ ). Trifluoroacetic acid (0.02% in  $\text{CDCl}_3$ ) was used as external reference for  $^{19}\text{F}$  ( $\delta = -76.5$  ppm). UV-vis-NIR spectra were measured on a Shimadzu UV-3150PC spectrometer. Fluorescence spectra were recorded on Horiba Fluorolog photospectrometer in a 10 mm quartz fluorescence cuvette. High resolution mass (HRMS) spectra were obtained in fast atom bombardment (FAB) mode with 3-nitrobenzyl alcohol (NBA) as a matrix on a JEOL LMS-HX-110 spectrometer. Cyclic voltammetric (CV) and differential pulse voltammetric (DPV) studies were carried out on a CH Instrument Model 620B (ALS) with electrochemical system utilizing the three-electrode configuration consisting of a glassy carbon (working electrode), platinum wire (counter electrode) and Ag/AgCl (reference electrode) in dichloromethane with *n*-tetrabutylammonium hexafluorophosphate ( $\text{TBAPF}_6$ ) as a supporting electrolyte. High performance liquid chromatography (HPLC) was performed on a Shimadzu LC-20AB equipped with a YMC R-ODS-5 column (4.6  $\times$  250 mm) and an SPD-M10A photodiode array detector.

## Preparation of 2, 3 and 4-Cu

### 2,12-Phenylthio-5,10,15,20-tetrakis(pentafluorophenyl)-3,13-diaza-21,23-dicarpa-isophlorin, 2:

Compound **1**<sup>[1]</sup> (20.0 mg, 20.6  $\mu\text{mol}$ ) was dissolved in a mixture of  $\text{CH}_2\text{Cl}_2$  (5 mL) and benzenethiol (10.5 mL, 103  $\mu\text{mol}$ ) and stirred for 1 h at room temperature. The solution color changed from dark red to yellow. After removing the solvent *in vacuo*, the residue was purified by silica gel column chromatography with hexane/ $\text{CH}_2\text{Cl}_2$  (1:1) as eluent. Recrystallization from hexane/ $\text{CH}_2\text{Cl}_2$  yielded 2.70 mg of compound **2** as yellow crystals;

Yield: 11 %,  $R_f = 0.15$  (hexane/ $\text{CH}_2\text{Cl}_2 = 1:1$ ).  $^1\text{H}$  NMR (600 MHz,  $\text{CD}_2\text{Cl}_2$ , ppm):  $\delta = 9.15$  (s, 2H, inner NH), 8.29 (d,  $J = 2.6$  Hz, 2H, inner CH), 8.14 (s, 2H, outer NH), 7.20–7.15 (m, 4H, Ph-H), 7.12–7.07 (m, 2H, Ph-H), 6.74–6.70 (m, 4H, Ph-H), 6.32 (d,  $J = 5.5$  Hz, 2H,  $\beta$ -H), 6.27 (d,  $J = 5.5$  Hz, 2H,  $\beta$ -H);  $^{13}\text{C}$  NMR (150 MHz,  $\text{CD}_2\text{Cl}_2$ , ppm):  $\delta = 146.61, 146.60, 145.54, 145.47, 145.38, 140.17, 139.01, 137.51, 137.35, 135.58, 130.28, 129.26, 129.20, 127.75, 126.13, 125.07, 118.97, 117.84, 113.91, 112.16, 94.66, 87.97$ ;  $^{19}\text{F}$  NMR (564 MHz,  $\text{CD}_2\text{Cl}_2$ , ppm):  $\delta = -139.35 \sim -139.65$  (m, 4F, *o*-Ph-F),  $-139.65 \sim -139.95$  (m, 4F, *o*-Ph-F),  $-155.15 \sim -155.80$  (m, 2F, *p*-Ph-F),  $-157.25 \sim -157.90$  (m, 2F, *p*-Ph-F),  $-161.70 \sim -162.55$  (m, 4F, *m*-Ph-F),  $-163.55 \sim -164.40$  (m, 4F, *m*-Ph-F); HRMS (FAB): calcd for  $\text{C}_{56}\text{H}_{19}\text{F}_{20}\text{N}_4\text{S}_2$   $[\text{M}]^+$ , 1192.0810; found 1192.0807 with errors of 0.3 ppm; UV-Vis ( $\text{CH}_2\text{Cl}_2$ ):  $\lambda_{\text{max}}[\text{nm}]$  ( $\epsilon, 10^4 \text{ M}^{-1}\text{cm}^{-1}$ ) = 438.7 (11.6).

### 2,12-Phenylthio-5,10,15,20-tetrakis(pentafluorophenyl)-3,13-diaza-21,23-dicarbaporphyrin, *trans*- $\text{N}_2\text{CP}(\text{SC}_6\text{H}_5)_2$ , 3:

$\text{Al}_2\text{O}_3$  (37 mg, 360  $\mu\text{mol}$ ) was added to a  $\text{CH}_2\text{Cl}_2$  solution (5 mL) of **2** (4.30 mg, 3.61  $\mu\text{mol}$ ), and

the mixture was stirred for 3 h at room temperature. After removing the solvent *in vacuo*, silica gel column chromatography (CH<sub>2</sub>Cl<sub>2</sub> as eluent) was performed to separate the yellow fraction. After evaporation, the residue was recrystallized from hexane/CH<sub>2</sub>Cl<sub>2</sub> to give 4.30 mg of the species **3** as yellow crystals;

Yield: ~100%,  $R_f = 0.44$  (CH<sub>2</sub>Cl<sub>2</sub>). <sup>1</sup>H NMR (600 MHz, CD<sub>2</sub>Cl<sub>2</sub>, ppm):  $\delta = 8.52$  (d,  $J = 4.6$  Hz, 2H,  $\beta$ -H), 8.36 (d,  $J = 4.6$  Hz, 2H,  $\beta$ -H), 7.67–7.63 (m, 4H, Ph-H), 7.45–7.37 (m, 6H, Ph-H), –2.69 (br, 2H, inner NH), –4.05 (s, 2H, inner CH); <sup>13</sup>C NMR (150 MHz, CD<sub>2</sub>Cl<sub>2</sub>, ppm):  $\delta = 167.13, 151.12, 147.66, 146.91, 145.98, 145.27, 144.56, 142.86, 141.23, 139.78, 139.21, 138.49, 136.98, 135.18, 135.02, 129.64, 129.52, 129.02, 126.52, 126.42, 113.86, 105.44$ ; <sup>19</sup>F NMR (564 MHz, CD<sub>2</sub>Cl<sub>2</sub>):  $\delta = -138.33$  (d,  $J = 5.6$  Hz, 4F, *o*-Ph-F), –138.72 (d,  $J = 5.6$  Hz, 4F, *o*-Ph-F), –155.13 (t,  $J = 22.6$  Hz, 2F, *p*-Ph-F), –154.52 (t,  $^3J_{FF} = 22.6$  Hz, 2F, *p*-Ph-F), –163.70 ~ –163.95 (m, 4F, *m*-Ph-F), –163.81 (t,  $^3J_{FF} = 5.6, 22.6$  Hz, 4F, *m*-Ph-F); HRMS (FAB): calcd for C<sub>56</sub>H<sub>19</sub>F<sub>20</sub>N<sub>4</sub>S<sub>2</sub> [M+H]<sup>+</sup>, 1191.0732, found 1191.0747 with errors of 1.3 ppm; UV-Vis (CH<sub>2</sub>Cl<sub>2</sub>):  $\lambda_{\max}$ [nm] ( $\epsilon, 10^4 \text{ M}^{-1}\text{cm}^{-1}$ ) = 395.5 (3.4), 482 (13.6), 578 (0.91), 627 (0.66), 813 (0.50).

### **2,12-Phenylthio-5,10,15,20-tetrakis(pentafluorophenyl)-3,13-diaza-21,23-dicarbaporphyrinato copper (III), 4-Cu:**

To a mixture CH<sub>2</sub>Cl<sub>2</sub>/MeOH solution (5 mL, 4:1 (v/v)) of porphyrin (**2**) (1.91 mg, 1.60  $\mu\text{mol}$ ), Cu(OAc)<sub>2</sub> (1.45 mg, 8.0  $\mu\text{mol}$ ) was added under aerobic condition. The resulting solution was stirred at room temperature for 30 min. The solution color changed from yellow to green. After removing the solvent *in vacuo*, the residue was purified by silica gel column chromatography with hexane/CH<sub>2</sub>Cl<sub>2</sub> (1:1) as eluent, Recrystallization from hexane/CH<sub>2</sub>Cl<sub>2</sub> afforded 1.98 mg of **4-Cu** as green crystals;

Yield 99%,  $R_f = 0.24$  (hexane: CH<sub>2</sub>Cl<sub>2</sub> = 1:1). <sup>1</sup>H NMR (600 MHz, CD<sub>2</sub>Cl<sub>2</sub>, ppm):  $\delta = 8.96$  (br s, 1H, outer NH), 8.26 (d,  $J = 5.4$  Hz, 2H,  $\beta$ -H), 8.20 (d,  $J = 5.4$  Hz, 2H,  $\beta$ -H), 7.92–7.85 (m, 2H, Ph-H), 7.82–7.70 (m, 5H, Ph-H), 7.55–7.43 (m, 3 H, Ph-H); <sup>13</sup>C NMR (150 MHz, CD<sub>2</sub>Cl<sub>2</sub>, ppm):  $\delta = 179.49, 173.28, 158.97, 152.95, 149.48, 147.84, 147.05, 146.44, 145.42, 144.94, 144.79, 143.68, 142.34, 141.12, 140.00, 138.51, 138.03, 137.11, 136.07, 135.33, 133.79, 132.58, 132.17, 131.72, 130.46, 130.25, 129.58, 129.41, 128.90, 128.59, 128.27, 126.37, 125.94, 124.44, 121.07, 114.02, 111.65, 108.45, 106.05, 101.55$ ; <sup>19</sup>F NMR (564 MHz, CD<sub>2</sub>Cl<sub>2</sub>, ppm):  $\delta = -136.85 \sim -137.05$  (dd,  $J = 5.6$  Hz, 2F, *o*-Ph-F), –137.85 ~ –138.05 (dd,  $J = 5.6$  Hz, 2F, *o*-Ph-F), –138.15 ~ –138.45 (m, 4F, *o*-Ph-F), –151.42 (t,  $J = 22.6$  Hz, 1F, *p*-Ph-F), –151.65 (t,  $J = 22.6$  Hz, 1F, *p*-Ph-F), –153.18 (t,  $J = 22.6$  Hz, 1F, *p*-Ph-F), –156.40 (t,  $J = 22.6$  Hz, 1F, *p*-Ph-F), –160.35 ~ –160.55 (dt,  $J = 5.6, 22.6$  Hz, 2F, *m*-Ph-F), –160.85 ~ –161.05 (dt,  $J = 5.6, 22.6$  Hz, 2F, *m*-Ph-F), –162.10 ~ –162.30 (dt,  $J = 5.6, 22.6$  Hz, 2F, *m*-Ph-F), –164.55 ~ –164.80 (dt,  $J = 5.6, 22.6$  Hz, 2F, *m*-Ph-F); HRMS (FAB): calcd for C<sub>56</sub>H<sub>15</sub>CuF<sub>20</sub>N<sub>4</sub>S<sub>2</sub>, 1249.9715; found 1249.9694 with errors of 1.7 ppm; UV-Vis (CH<sub>2</sub>Cl<sub>2</sub>):  $\lambda_{\max}$ [nm] ( $\epsilon, 10^4 \text{ M}^{-1}\text{cm}^{-1}$ ) = 357 (7.9), 469 (4.5), 509 (2.0), 611 (5.7), 722 (0.9), 794 (1.5).

[1] H. Maeda, A. Osuka and H. Furuta, *H. J. Am. Chem. Soc.* 2003, **125**, 15690.

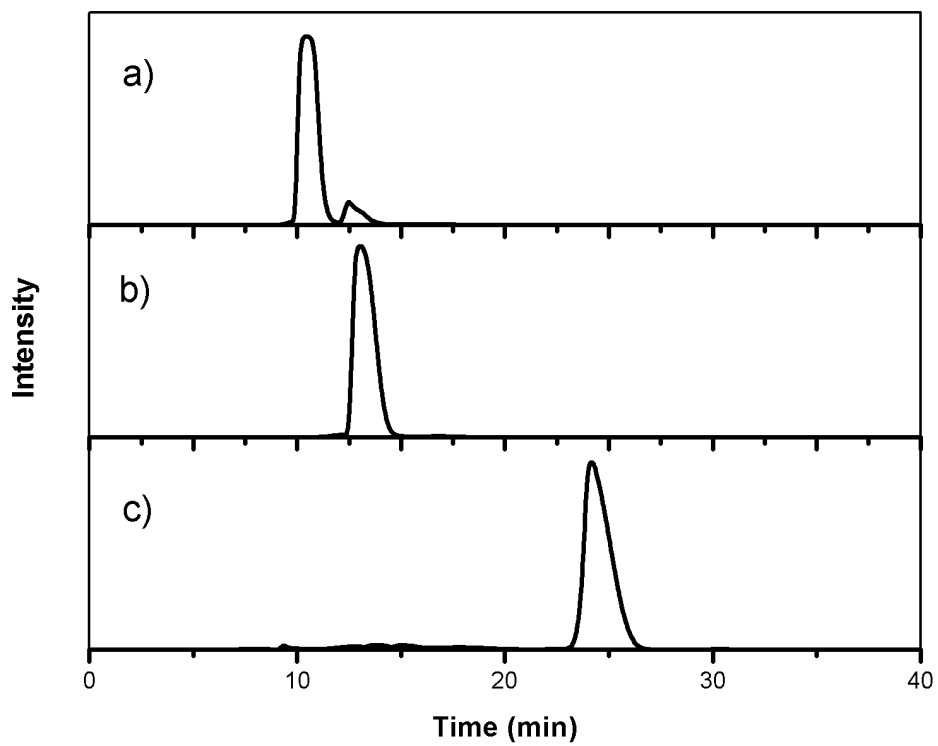

**Fig. S1.** HPLC charts of (a) **2**, (b) **3** and (c) **4-Cu** with a YMC R-ODS-5 column ( $4.6 \times 250$  mm) using  $\text{CH}_3\text{CN}$ . Constant flow rate was 0.5 mL/min.

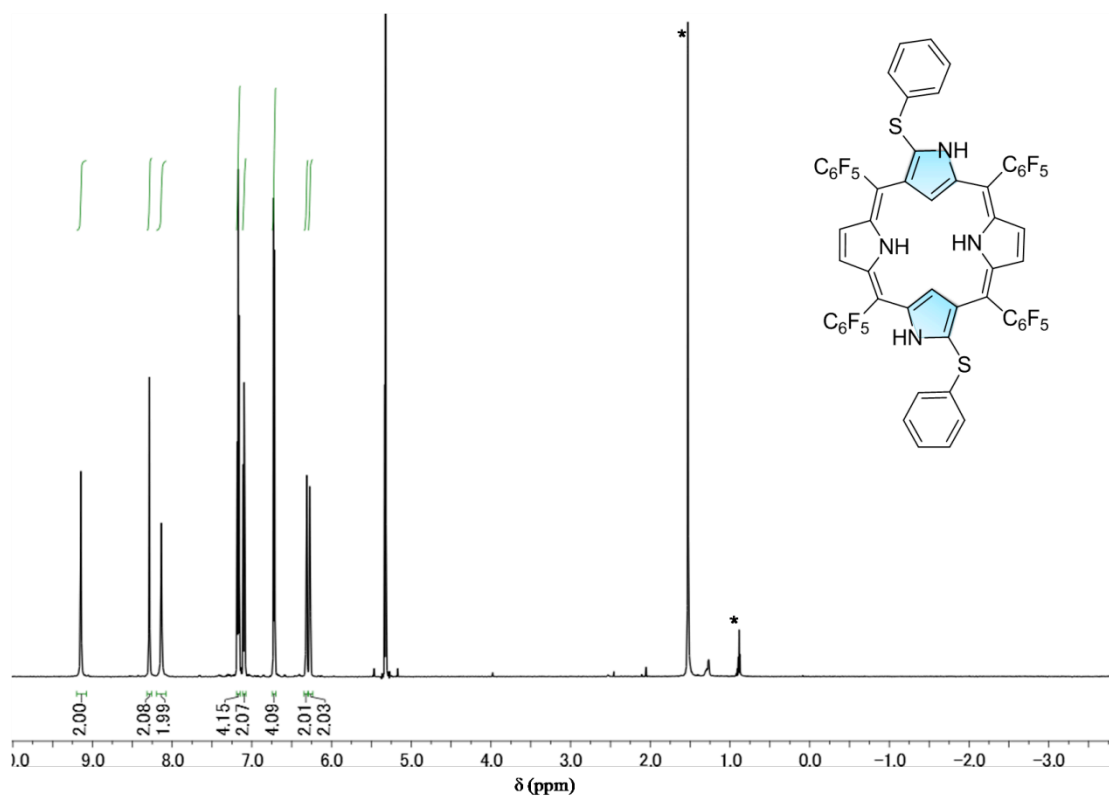

**Fig. S2.**  $^1\text{H}$  NMR spectrum of **2** in  $\text{CD}_2\text{Cl}_2$ . Asterisks indicate the peaks of residual solvents and impurities.

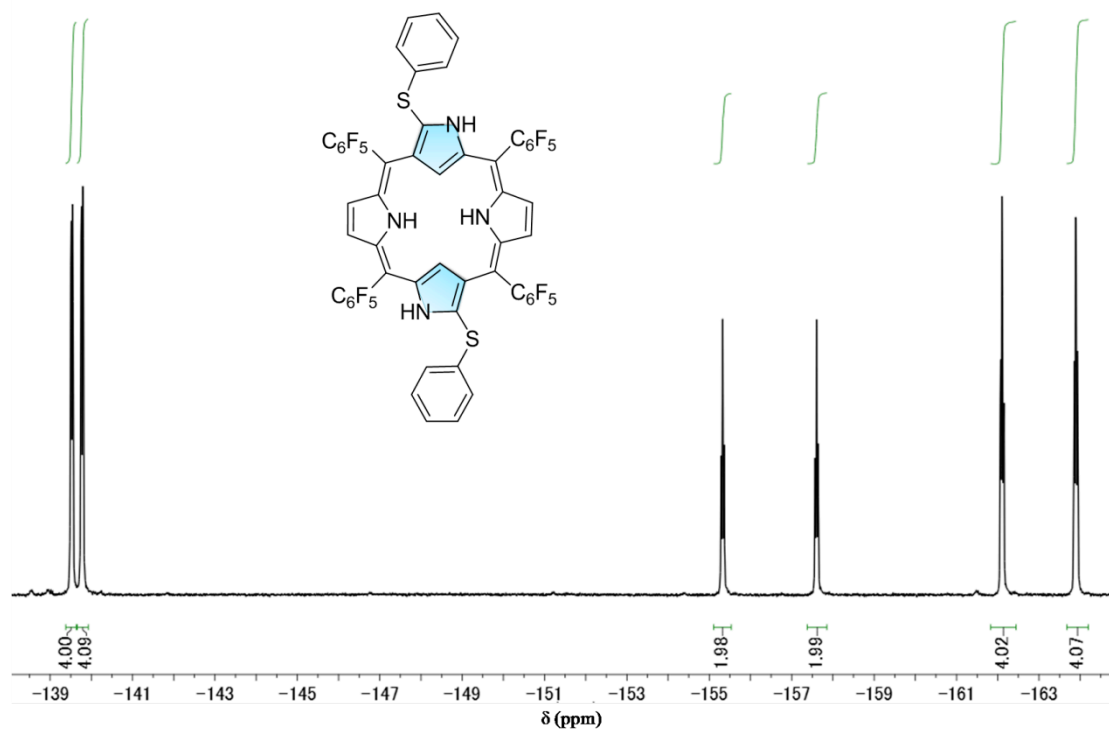

**Fig. S3.**  $^{19}\text{F}$  NMR spectrum of **2** in  $\text{CD}_2\text{Cl}_2$ .

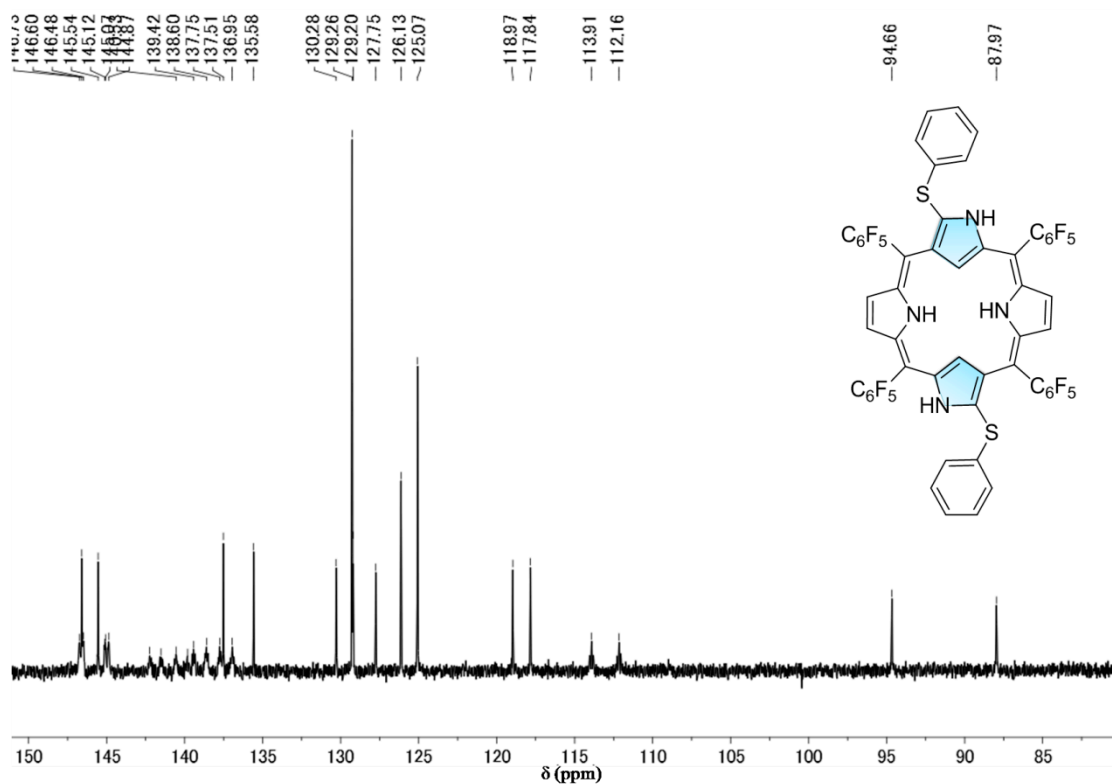

Fig. S4. <sup>13</sup>C NMR spectrum of **2** in CD<sub>2</sub>Cl<sub>2</sub>.

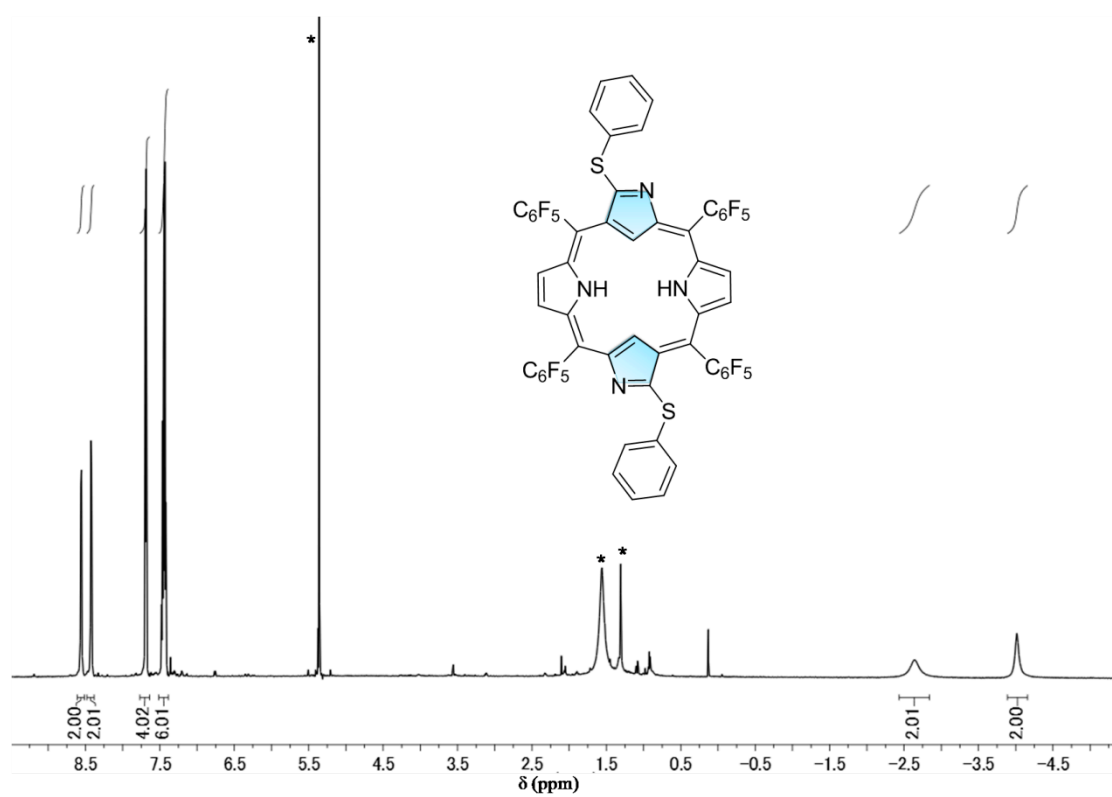

Fig. S5. <sup>1</sup>H NMR spectrum of **3** in CD<sub>2</sub>Cl<sub>2</sub>. Asterisks indicate the peaks of residual solvents and impurities.

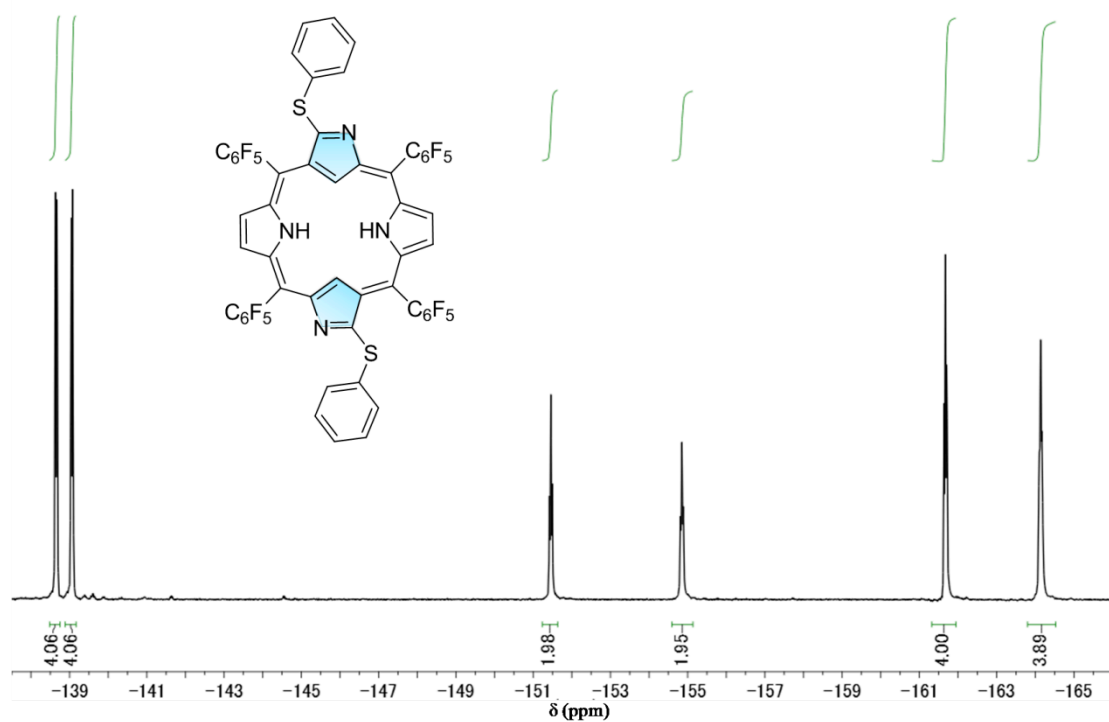

Fig. S6.  $^{19}\text{F}$  NMR spectrum of **3** in  $\text{CD}_2\text{Cl}_2$ .

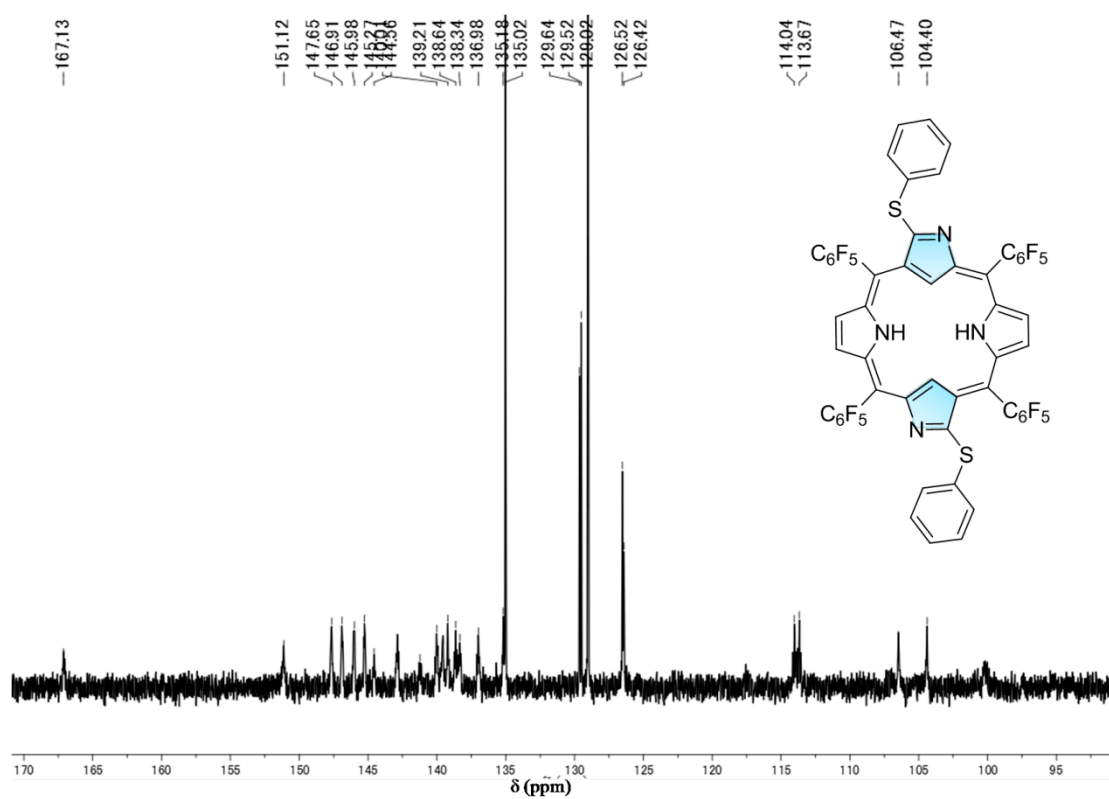

Fig. S7.  $^{13}\text{C}$  NMR spectrum of **3** in  $\text{CD}_2\text{Cl}_2$ .

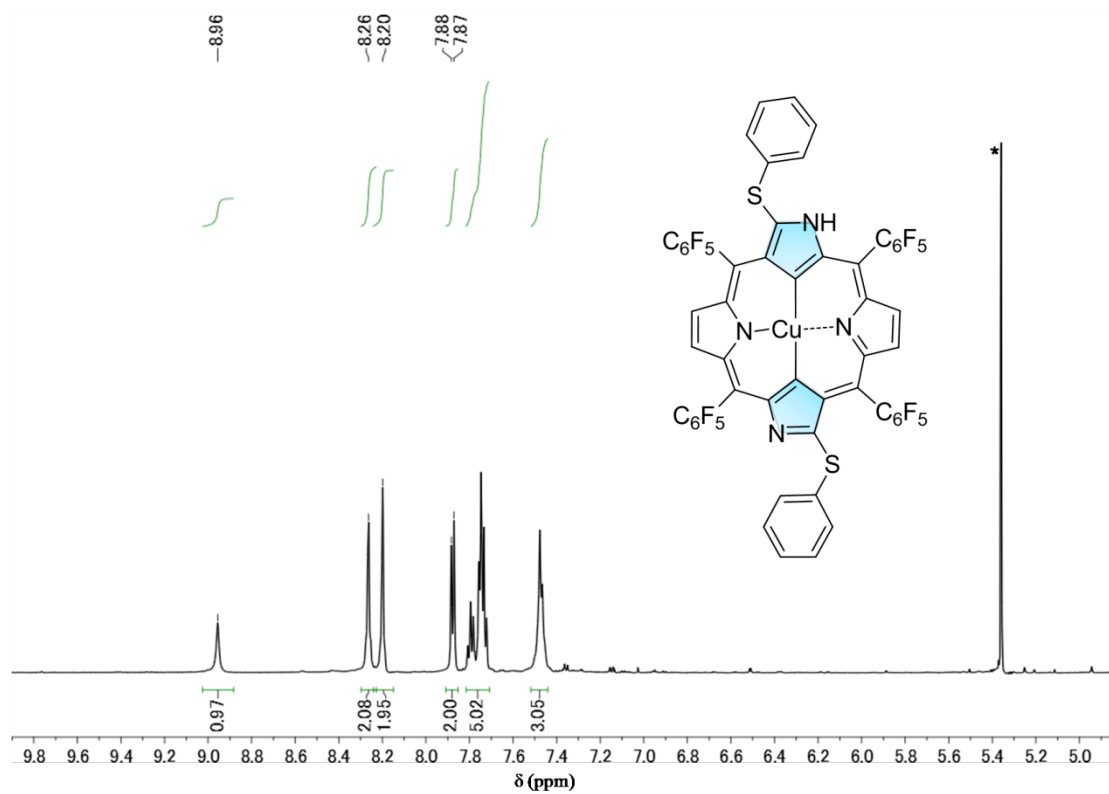

**Fig. S8.**  $^1\text{H}$  NMR spectrum of **4-Cu** in  $\text{CD}_2\text{Cl}_2$ . Asterisk indicates the residual solvent peak.

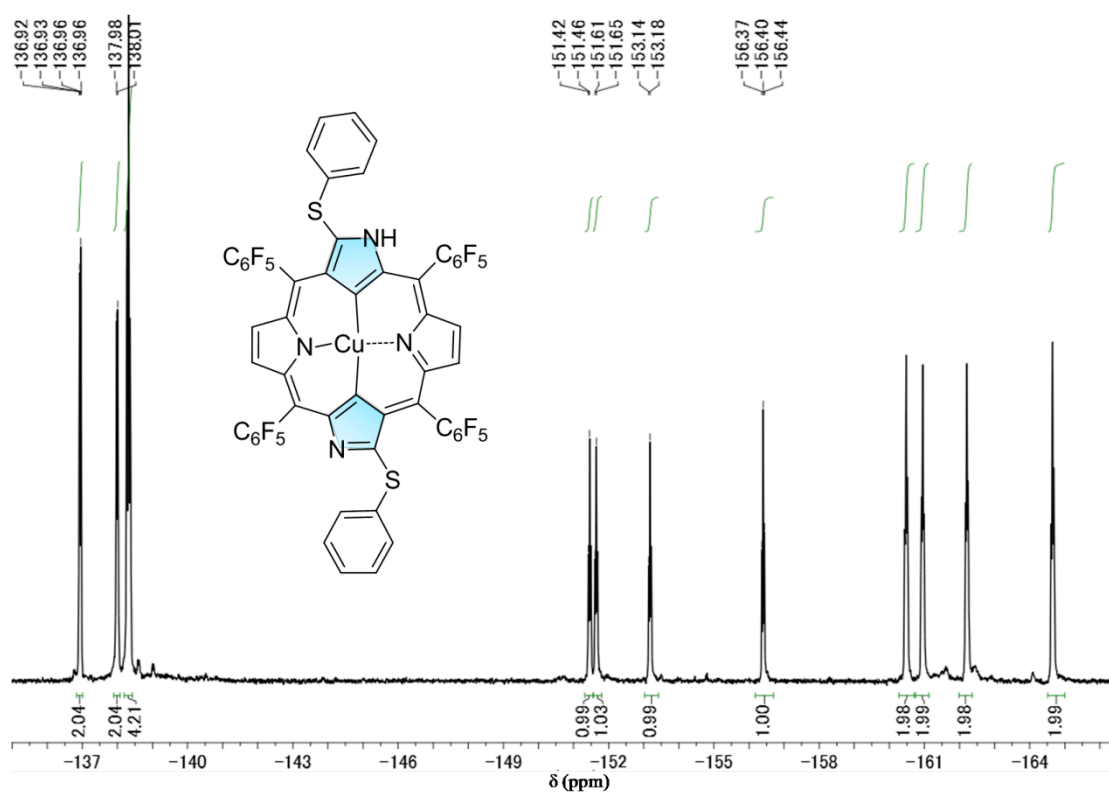

**Fig. S9.**  $^{19}\text{F}$  NMR spectrum of **4-Cu** in  $\text{CD}_2\text{Cl}_2$ .



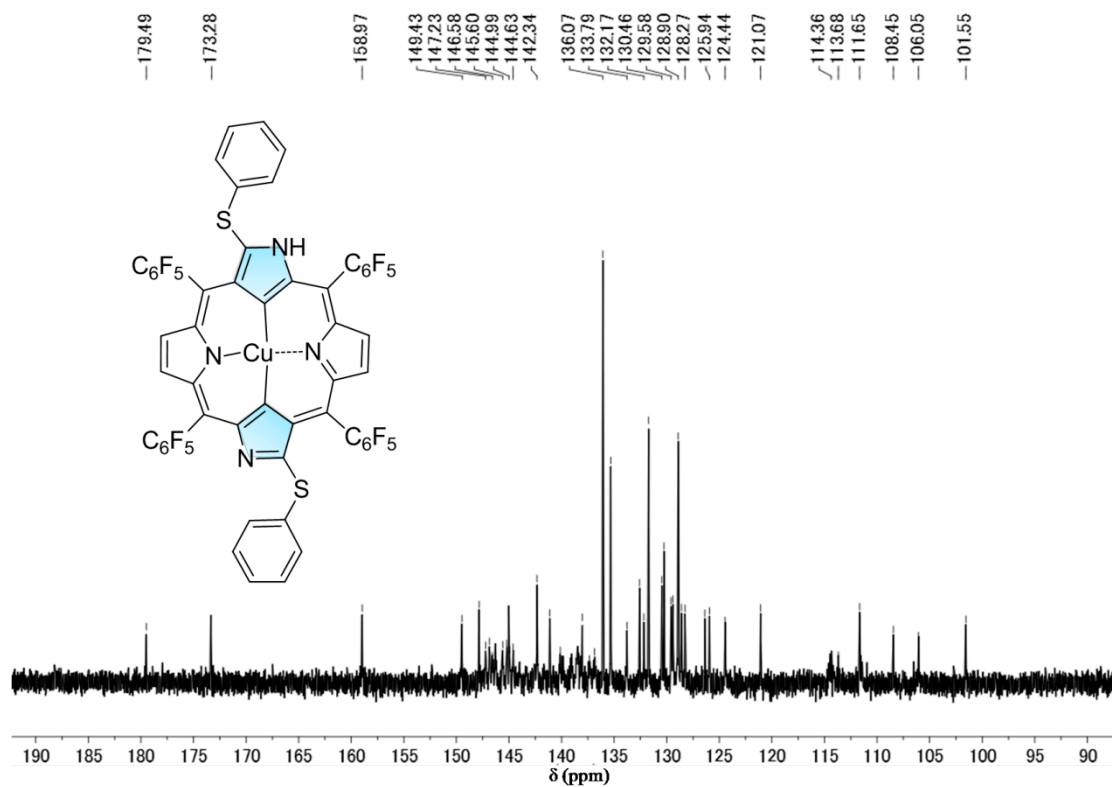

**Fig. S10.**  $^{13}\text{C}$  NMR spectrum of **4-Cu** in  $\text{CD}_2\text{Cl}_2$ .

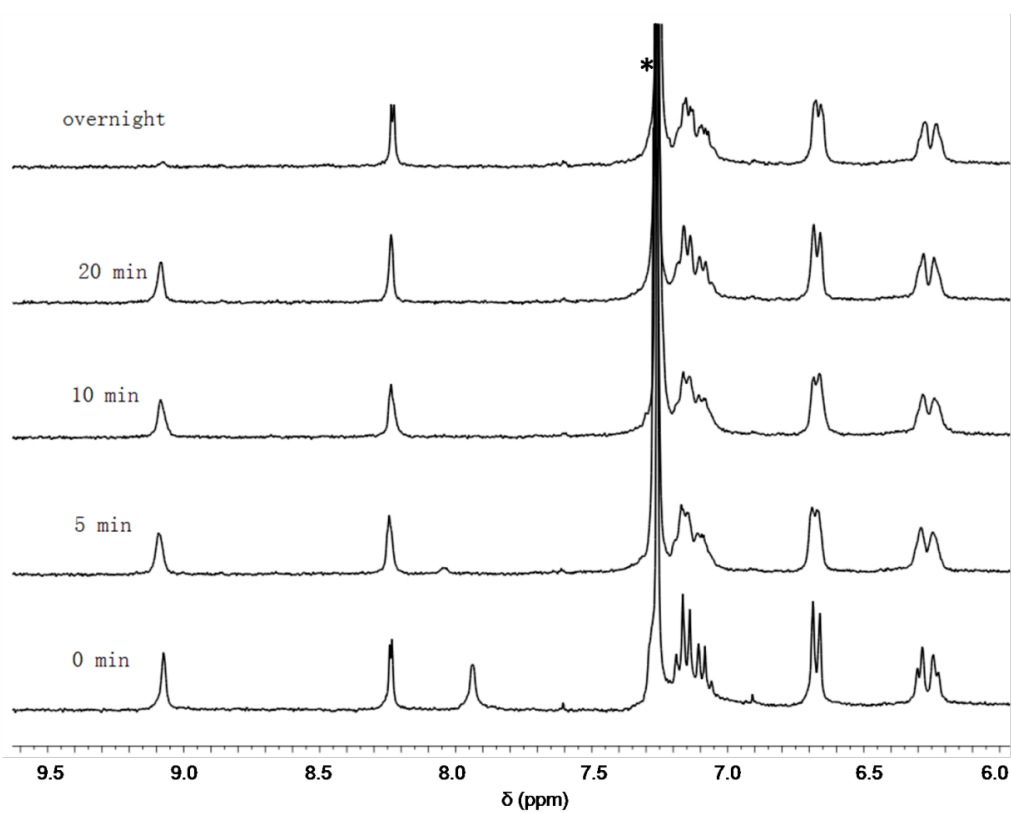

**Fig. S11.**  $^1\text{H}$  NMR spectral changes of **2** (in  $\text{CDCl}_3$ ) upon addition of  $\text{D}_2\text{O}$ . Asterisk indicates the residual solvent peaks.

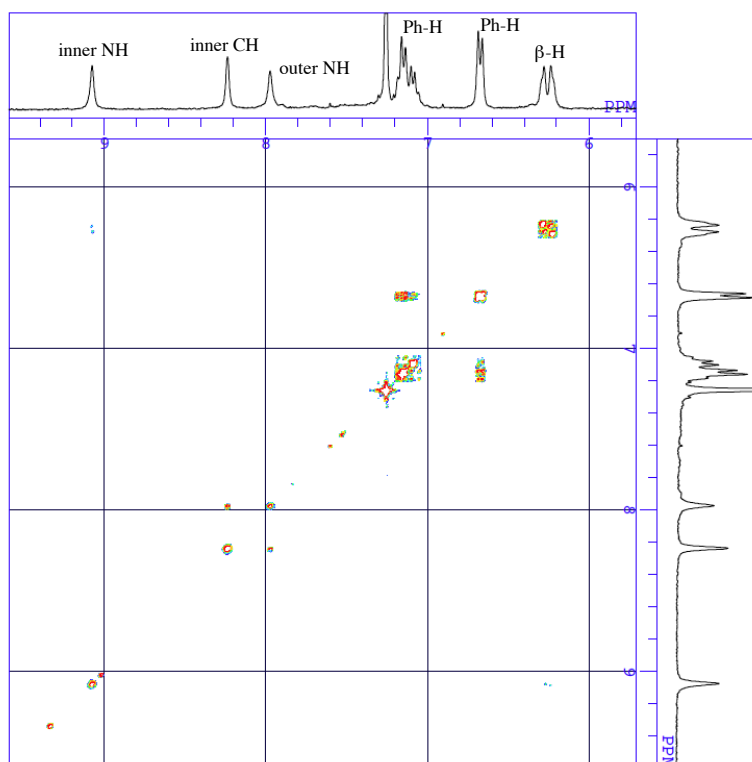

**Fig. S12.**  $^1\text{H}$ - $^1\text{H}$  COSY spectrum of **2** in  $\text{CDCl}_3$ .

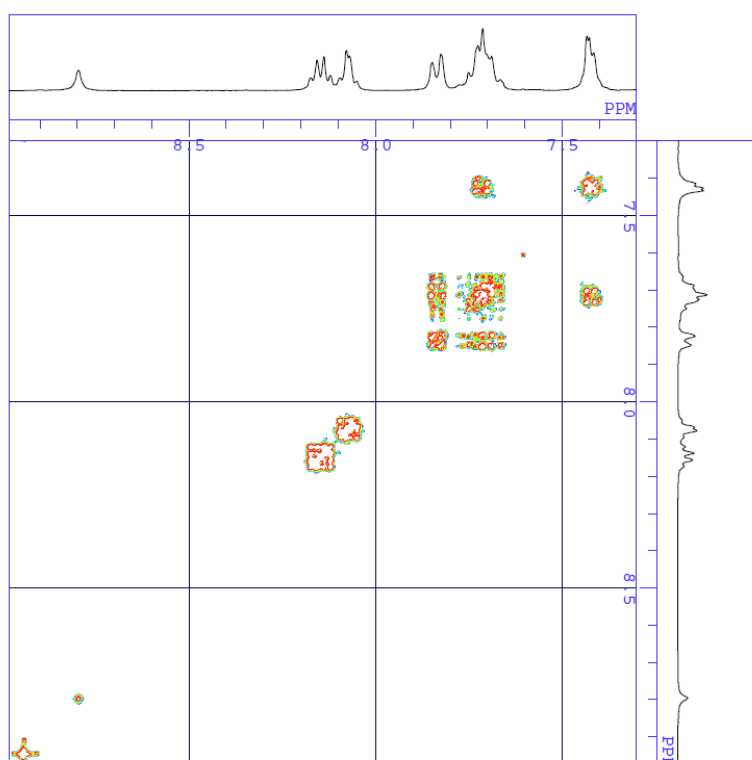

**Fig. S13.**  $^1\text{H}$ - $^1\text{H}$  COSY spectrum of **4-Cu** in  $\text{CDCl}_3$ .

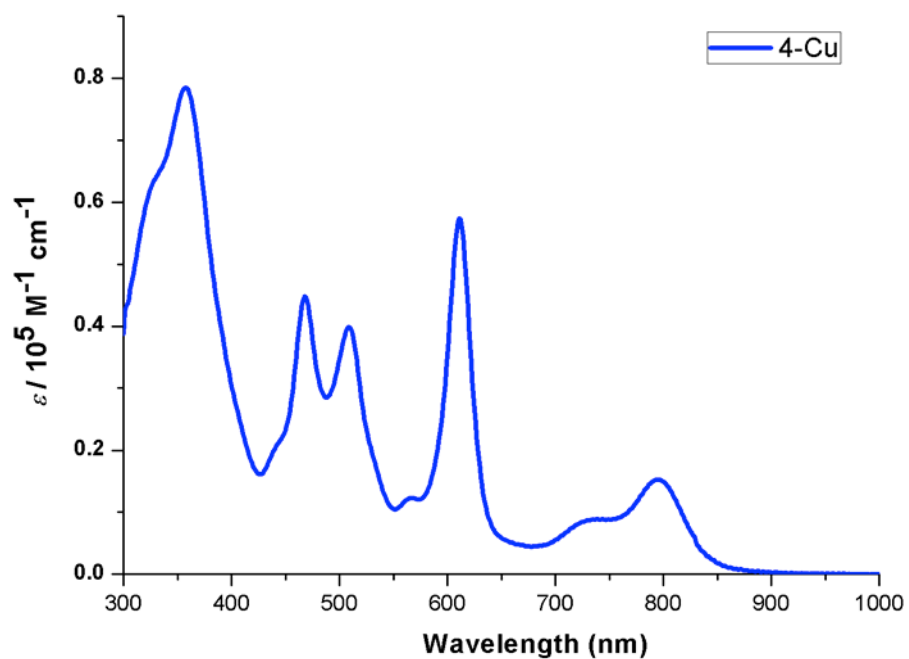

**Fig. S14.** UV/vis absorption spectrum of **4-Cu** in  $\text{CH}_2\text{Cl}_2$ .

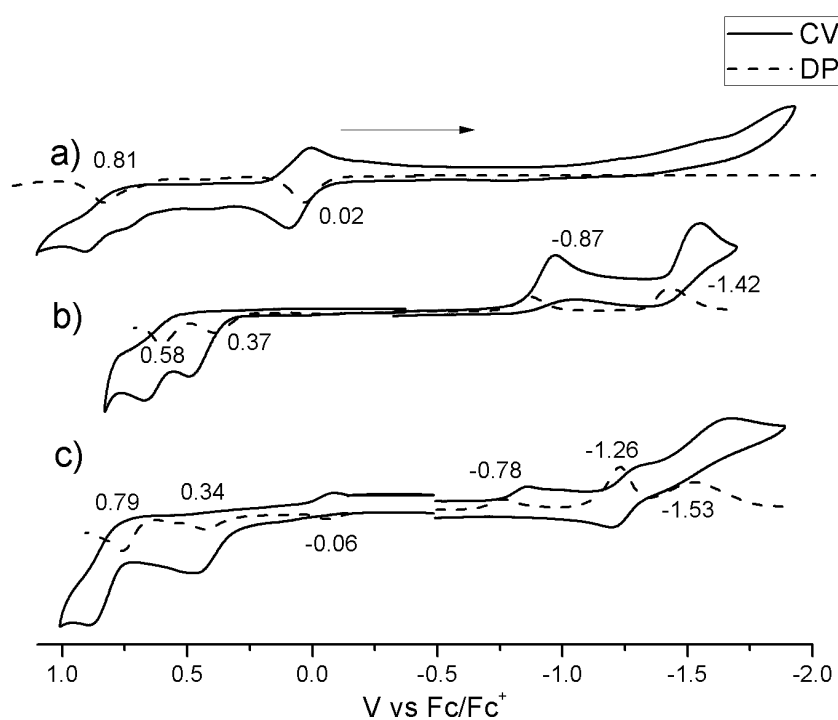

**Fig. S15.** Cyclic voltammograms (solid line) and differential pulse voltammograms (dashed line) of (a) **2**, (b) **3** and (c) **4-Cu** in the  $\text{CH}_2\text{Cl}_2$  solution containing 0.1 M  $n\text{-Bu}_4\text{NPF}_6$  as the supporting electrolyte. All potentials were calibrated by a  $\text{Fc}/\text{Fc}^+$  redox couple. Scan rate;  $0.1 \text{ Vs}^{-1}$ . The arrow indicates the direction of cyclic voltammetry measurements.

## X-ray Crystallography

X-ray single crystal measurements for **2**, **3** and **4-Cu** were carried out on a Rigaku RAXIS RAPID and Saturn 724 diffractometers. The structures were solved by the direct method (SIR2004)<sup>[2]</sup> and refined anisotropically for non-hydrogen atoms by full-matrix least-squares procedures (SHELXL-97).<sup>[3]</sup> The positional parameters and thermal parameters of non-hydrogen atoms were refined anisotropically on  $F^2$  by the full-matrix least-squares method. Hydrogen atoms were placed at calculated positions and refined riding on their corresponding carbon atoms. All calculations except for refinement were performed by using CrystalStructure<sup>[4]</sup> software package of the Rigaku Corporation.

For mean deviation (m.d.) calculations, 24 atoms of the core macrocycle are selected to define the mean plane for all derivatives.

[2] M.C. Burla, R. Caliendo, M. Camalli, B. Carrozzini, G.L. Cascarano, L. De Caro, C. Giacovazzo, G. Polidori, R. Spagna (2005)

[3] G. M. Sheldrick, Program for the Solution of Crystal Structures, University of Göttingen, Göttingen, Germany, 1997.

[4] CrystalStructure 4.0: Crystal Structure Analysis Package, Rigaku Corporation (2000–2010). Tokyo 196-8666, Japan.

**Table S1.** Crystal data and structure analysis results for **2**, **3** and **4-Cu**

|                                                             | <b>2</b>                                                                                        | <b>3</b>                                                                      | <b>4-Cu</b>                                                                                                       |
|-------------------------------------------------------------|-------------------------------------------------------------------------------------------------|-------------------------------------------------------------------------------|-------------------------------------------------------------------------------------------------------------------|
| Formula                                                     | C <sub>56</sub> H <sub>20</sub> F <sub>20</sub> N <sub>4</sub> S <sub>2</sub> •H <sub>2</sub> O | C <sub>56</sub> H <sub>18</sub> F <sub>20</sub> N <sub>4</sub> S <sub>2</sub> | C <sub>56</sub> H <sub>15</sub> CuF <sub>20</sub> N <sub>4</sub> S <sub>2</sub> •2CH <sub>2</sub> Cl <sub>2</sub> |
| Formula Weight                                              | 1210.90                                                                                         | 1190.86                                                                       | 1421.26                                                                                                           |
| Crystal system                                              | monoclinic                                                                                      | monoclinic                                                                    | orthorhombic                                                                                                      |
| <i>T</i> (K)                                                | 123                                                                                             | 100                                                                           | 100                                                                                                               |
| Space group                                                 | <i>P</i> 2 <sub>1</sub> / <i>n</i>                                                              | <i>P</i> 2 <sub>1</sub> / <i>c</i>                                            | <i>P</i> bca                                                                                                      |
| <i>a</i> (Å)                                                | 17.201(6)                                                                                       | 11.9072(2)                                                                    | 31.3073(6)                                                                                                        |
| <i>b</i> (Å)                                                | 15.424(4)                                                                                       | 25.4953(5)                                                                    | 21.1481(4)                                                                                                        |
| <i>c</i> (Å)                                                | 19.135(7)                                                                                       | 24.1650(4)                                                                    | 16.0579(3)                                                                                                        |
| $\alpha$ (deg)                                              | 90                                                                                              | 90                                                                            | 90                                                                                                                |
| $\beta$ (deg)                                               | 111.208(5)                                                                                      | 99.372(7)                                                                     | 90                                                                                                                |
| $\gamma$ (deg)                                              | 90                                                                                              | 90                                                                            | 90                                                                                                                |
| <i>V</i> (Å <sup>3</sup> )                                  | 4733(3)                                                                                         | 7238.0(3)                                                                     | 10631.8(3)                                                                                                        |
| <i>Z</i>                                                    | 4                                                                                               | 6                                                                             | 8                                                                                                                 |
| <i>D</i> <sub>calc</sub> (g cm <sup>-3</sup> )              | 1.699                                                                                           | 1.639                                                                         | 1.776                                                                                                             |
| Crystal size (mm)                                           | 0.15 x 0.06 x 0.02                                                                              | 0.22 x 0.10 x 0.08                                                            | 0.24 x 0.20 x 0.13                                                                                                |
| 2 $\theta$ <sub>min</sub> , 2 $\theta$ <sub>max</sub> (deg) | 2.7, 55.1                                                                                       | 6.9, 136.5                                                                    | 7.0, 136.5                                                                                                        |
| No. of rflns measd<br>(unique)                              | 10844                                                                                           | 13196                                                                         | 9730                                                                                                              |
| No. of rflns measd<br>( <i>I</i> > 2 $\sigma$ ( <i>I</i> )) | 5376                                                                                            | 10735                                                                         | 8498                                                                                                              |
| No. of parameters                                           | 854                                                                                             | 1208                                                                          | 860                                                                                                               |
| Goodness-of-fit                                             | 1.073                                                                                           | 1.031                                                                         | 1.057                                                                                                             |
| <i>R</i> <sub>1</sub>                                       | 0.0820                                                                                          | 0.0432                                                                        | 0.0665                                                                                                            |
| w <i>R</i> <sub>2</sub> (all data)                          | 0.2284                                                                                          | 0.1138                                                                        | 0.1965                                                                                                            |
| $\Delta$ (ε Å <sup>-3</sup> )                               | 0.498, -0.493                                                                                   | 0.379, -0.318                                                                 | 0.844, -1.631                                                                                                     |
| Diffractometer                                              | Saturn 724                                                                                      | R-AXIS RAPID                                                                  | R-AXIS RAPID                                                                                                      |
| CCDC number                                                 | 1008503                                                                                         | 1008504                                                                       | 1008505                                                                                                           |

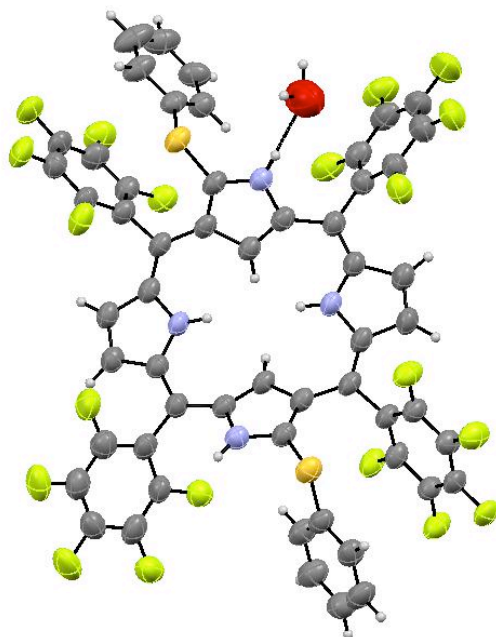

**Fig. S16.** X-ray crystal structure of **2** with a hydrogen-bonded water molecule. The thermal ellipsoids are scaled at the 50% probability level.

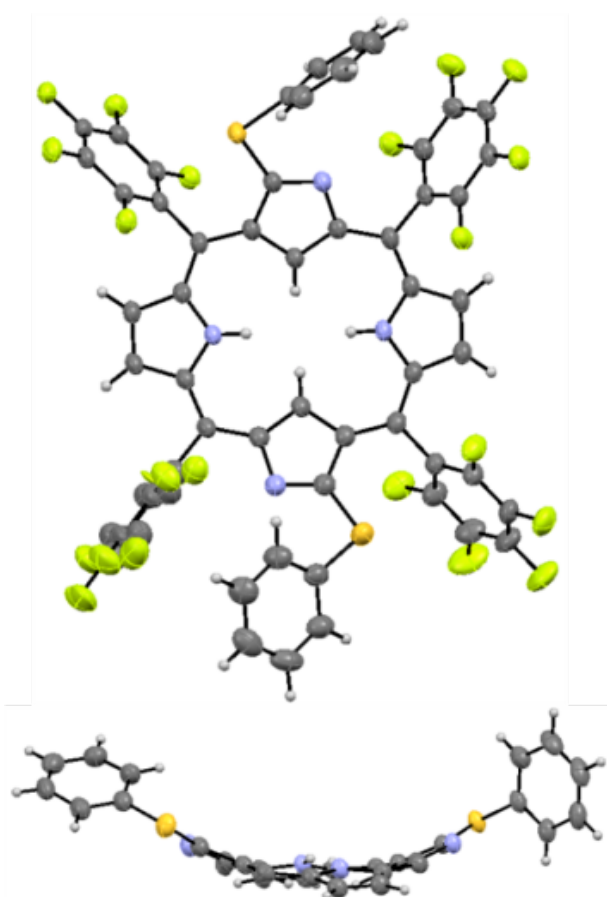

**Fig. S17.** X-ray crystal structure of another geometry of **3** found in the packing lattice. Pentafluorophenyl groups are omitted for clarity in the side view (bottom). The thermal ellipsoids are scaled at the 50% probability level. The structure was labeled as **3(2)** to differentiate the text one, **3(1)**.

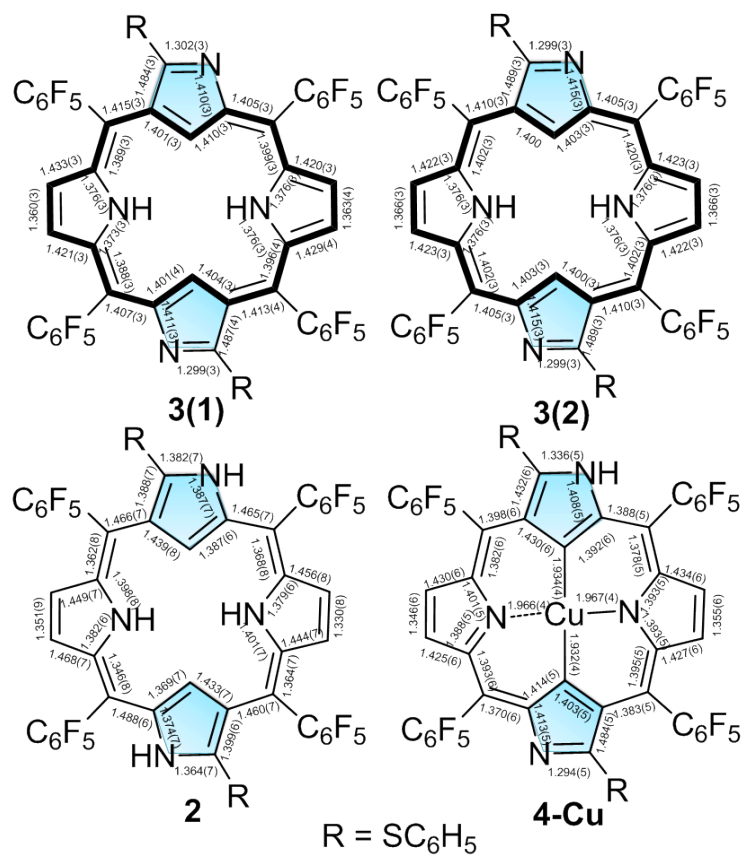

Fig. S18. Selected bond lengths (Å) of **2**, **3** and **4-Cu**.

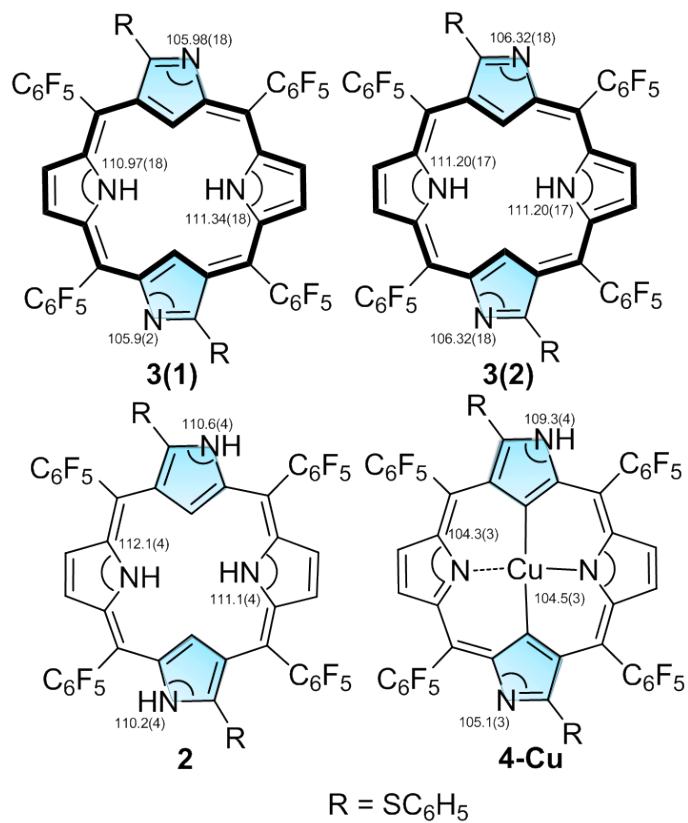

Fig. S19. Selected C-N-C angles (deg) of **2**, **3** and **4-Cu**.

### Calculations details

Theoretical calculations were performed with the *Gaussian09*<sup>[5]</sup> program suite using a supercomputer.<sup>[6]</sup> All calculations were carried out using the density functional theory (DFT) method with Becke's three-parameter hybrid exchange functionals and the Lee-Yang-Parr correlation functional (B3LYP) employing the 6-31G(d,p) basis set for C, H, N, F atoms and LANL2DZ basis for Cu atom (denoted as 6-31LAN for **4-Cu**).<sup>[6]</sup> The NICS<sup>[7]</sup> value was obtained with gauge independent atomic orbital (GIAO) method based on the optimized geometries. To simulate the ground-state absorption spectra, the time-dependent (TD) DFT calculation was employed with B3LYP/6-31G(d,p) level.

[5] Gaussian 09, Revision A.1, Frisch, M. J.; Trucks, G. W.; Schlegel, H. B.; Scuseria, G. E.; Robb, M. A.; Cheeseman, J. R.; Scalmani, G.; Barone, V.; Mennucci, B.; Petersson, G. A.; Nakatsuji, H.; Caricato, M.; Li, X.; Hratchian, H. P.; Izmaylov, A. F.; Bloino, J.; Zheng, G.; Sonnenberg, J. L.; Hada, M.; Ehara, M.; Toyota, K.; Fukuda, R.; Hasegawa, J.; Ishida, M.; Nakajima, T.; Honda, Y.; Kitao, O.; Nakai, H.; Vreven, T.; Montgomery, Jr., J. A.; Peralta, J. E.; Ogliaro, F.; Bearpark, M.; Heyd, J. J.; Brothers, E.; Kudin, K. N.; Staroverov, V. N.; Kobayashi, R.; Normand, J.; Raghavachari, K.; Rendell, A.; Burant, J. C.; Iyengar, S. S.; Tomasi, J.; Cossi, M.; Rega, N.; Millam, N. J.; Klene, M.; Knox, J. E.; Cross, J. B.; Bakken, V.; Adamo, C.; Jaramillo, J.; Gomperts, R.; Stratmann, R. E.; Yazyev, O.; Austin, A. J.; Cammi, R.; Pomelli, C.; Ochterski, J. W.; Martin, R. L.; Morokuma, K.; Zakrzewski, V. G.; Voth, G. A.; Salvador, P.; Dannenberg, J. J.; Dapprich, S.; Daniels, A. D.; Farkas, Ö.; Foresman, J. B.; Ortiz, J. V.; Cioslowski, J.; Fox, D. J. Gaussian, Inc., Wallingford CT, **2009**.

[6] (a) A. D. Becke, *Phys. Rev. A* **1988**, *38*, 3098. (b) C. Lee, W. Yang and R. G. Parr, *Phys. Rev. B* **1988**, *37*, 785.

[7] P. v. R. Schleyer, C. Maerker, A. Dransfeld, H. Jiao and N. v. E. Hommes, *J. Am. Chem. Soc.* **1996**, *118*, 6317.



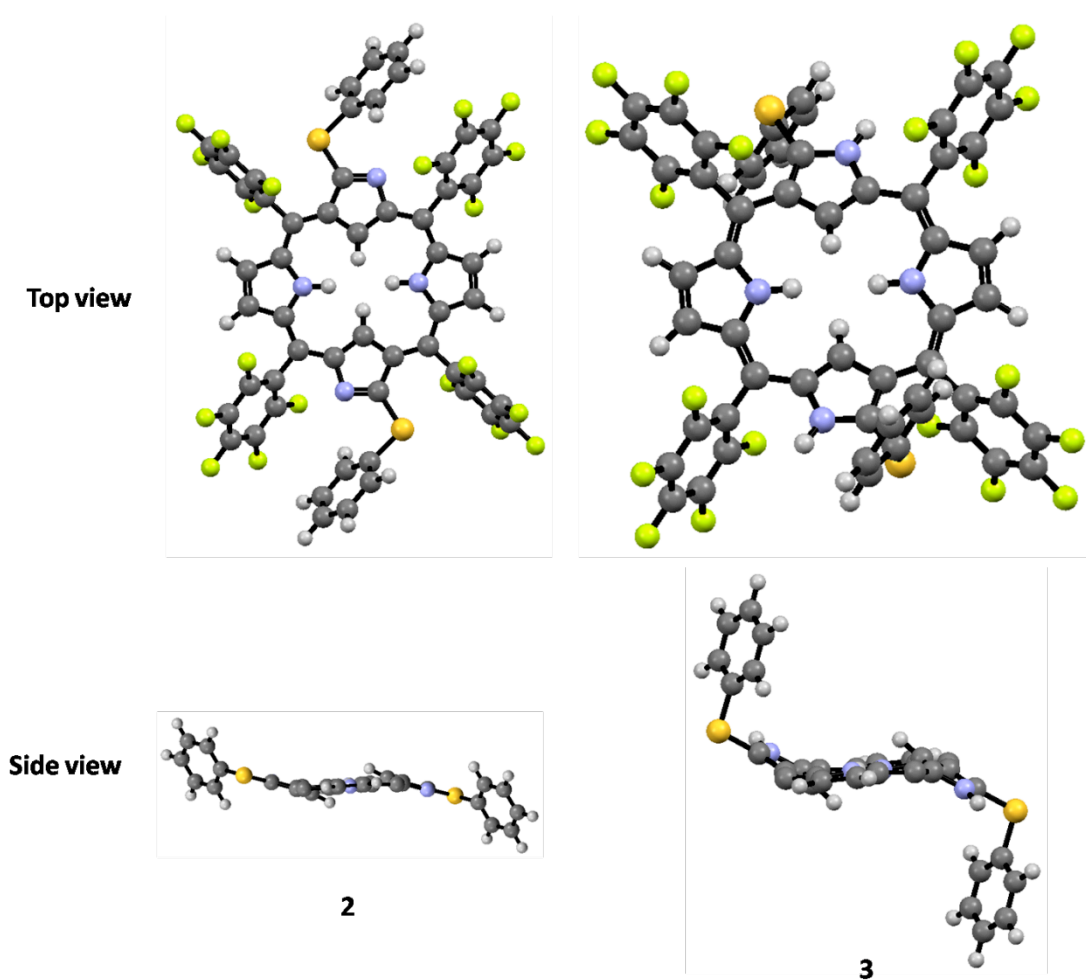

**Fig. S20.** Top view (left) and side view (right) of the optimized structures of (a) **2** and (b) **3** obtained by DFT (B3LYP/6-31G\*\*) calculations.

**Table S2.** HOMA values calculated based on the x-ray structures and optimized structures<sup>[8]</sup>

|             | X-ray structures |          |          | optimized structures |          |          |
|-------------|------------------|----------|----------|----------------------|----------|----------|
|             | EN               | GEO      | HOMA     | EN                   | GEO      | HOMA     |
| <b>2</b>    | 0.170503         | 0.669012 | 0.160485 | 0.244994             | 0.44076  | 0.314246 |
| <b>3(1)</b> | 0.057982         | 0.092285 | 0.849732 | 0.153984             | 0.080676 | 0.765341 |
| <b>3(2)</b> | 0.080431         | 0.069235 | 0.850334 |                      |          |          |
| <b>4-Cu</b> | 0.023257         | 0.154799 | 0.821944 | 0.062803             | 0.221665 | 0.715532 |

$$\begin{aligned}
 \text{HOMA} &= 1 - \frac{\alpha}{n} \sum [R_{opt} - R_i]^2 \\
 &= 1 - \alpha (R_{opt} - R_{av})^2 - \frac{\alpha}{n} \sum [R_{av} - R_i]^2 \\
 &= 1 - \text{EN} - \text{GEO}
 \end{aligned}$$

[8] T. M. Crygowski and M. Cyrański, *Tetrahedron* 1996, **52**, 1713 and 10255.

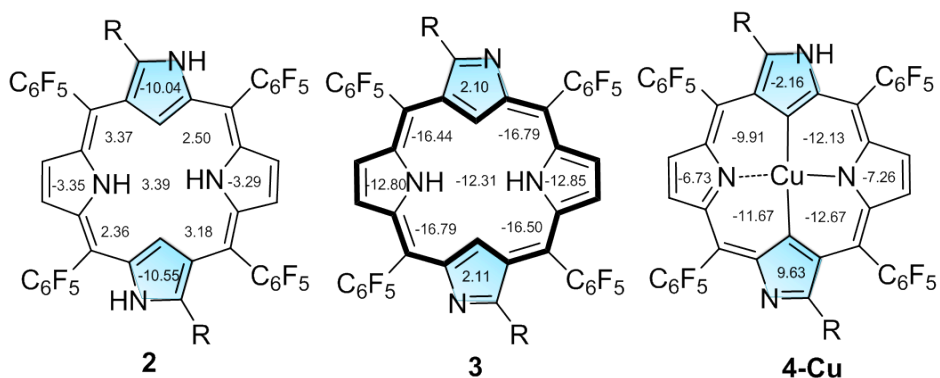

**Fig. S21.** NICS values (ppm) for **2**, **3** and **4-Cu** obtained by GIAO-B3LYP/6-31(d,p) (**2**, **3**) and GIAO-B3LYP/6-31G(d,p)/LANL2DZ (**4-Cu**) calculations. (R = SC<sub>6</sub>H<sub>5</sub>)

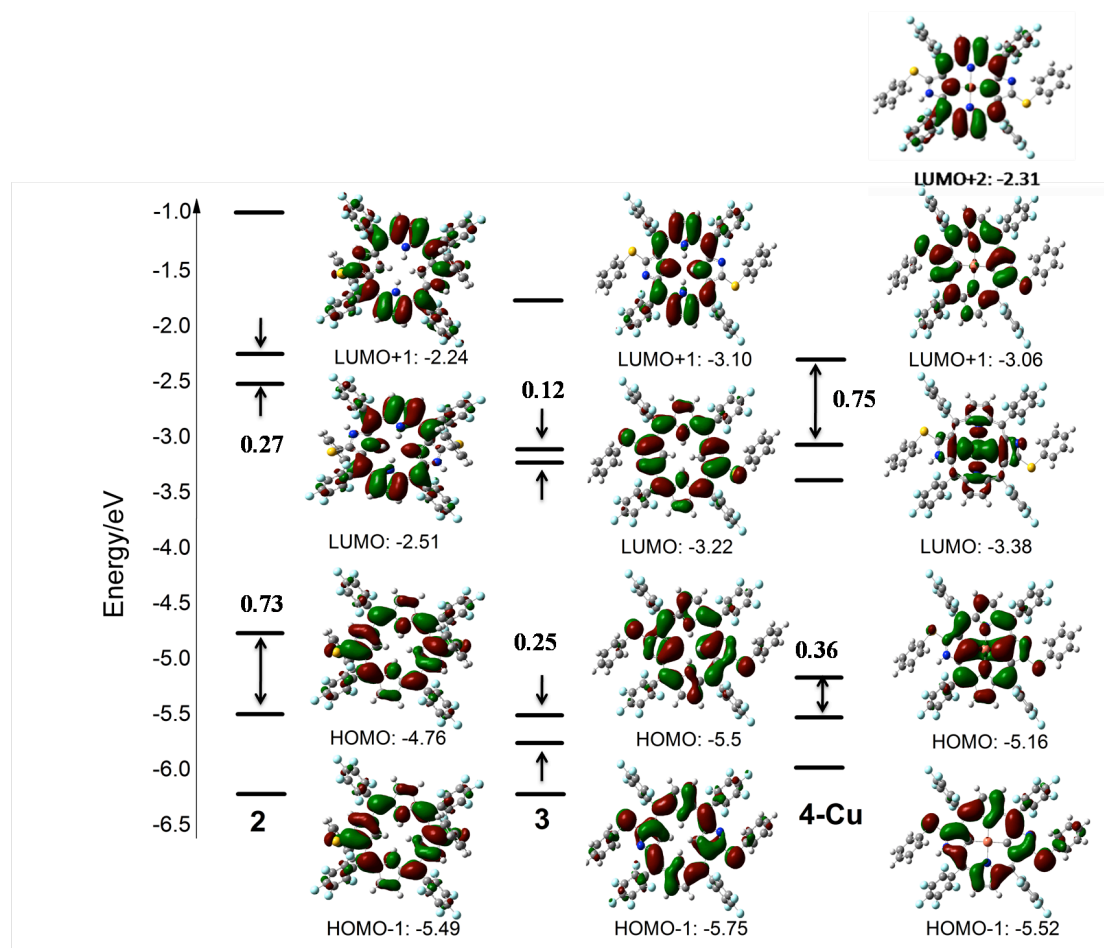

**Fig. S22.** MO diagrams of **2**, **3** and **4-Cu** obtained from the calculations at the B3LYP/6-31G(d,p) (**2**, **3**) and B3LYP/6-31G(d,p)/LanL2DZ (**4-Cu**) levels, respectively.

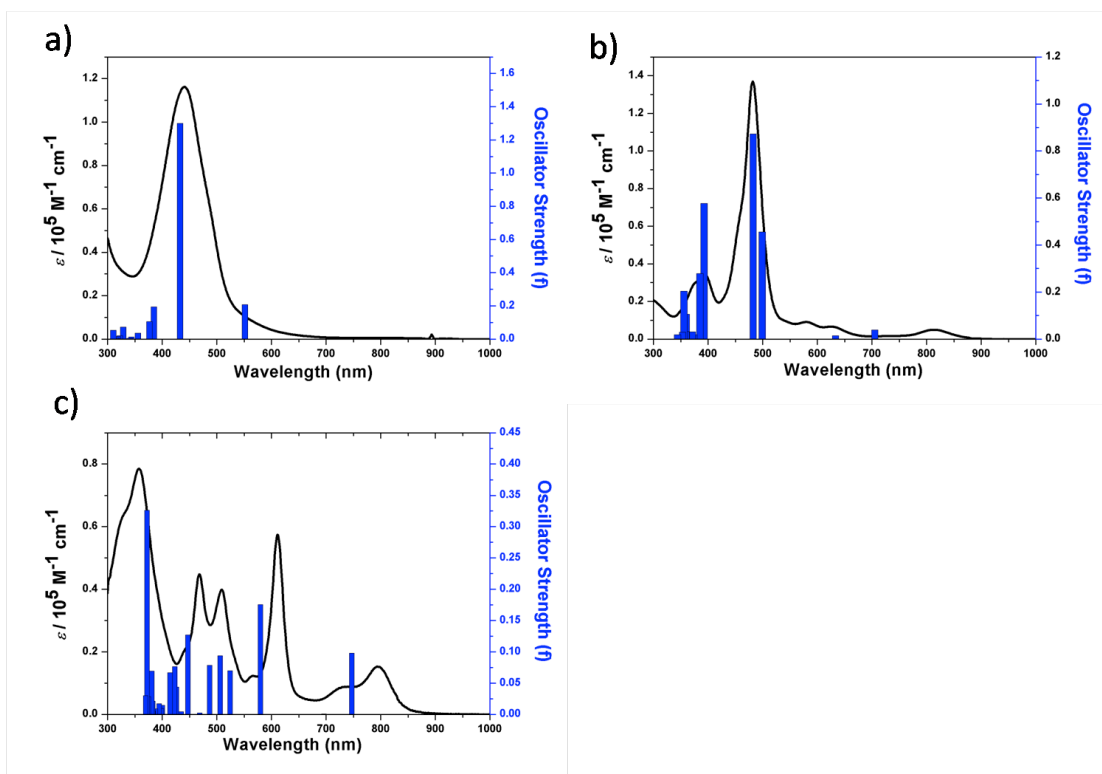

**Fig. S23.** TD-DFT (B3LYP/6-31G\*\*) calculations for (a) **2**, (b) **3** and (c) **4-Cu** along with the experimental spectra in  $\text{CH}_2\text{Cl}_2$ .

## Cartesian coordinates for optimized structures for 2, 3 and 4-Cu

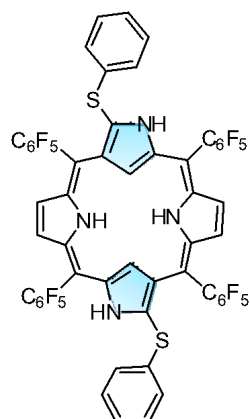

**2**

Stoichiometry C<sub>56</sub>H<sub>20</sub>F<sub>20</sub>N<sub>4</sub>S<sub>2</sub>

Framework group C1[X(C<sub>56</sub>H<sub>20</sub>F<sub>20</sub>N<sub>4</sub>S<sub>2</sub>)]

Deg. of freedom 300

Full point group C1 NOp 1

Largest Abelian subgroup C1 NOp 1

Largest concise Abelian subgroup C1 NOp 1

Standard orientation:

| Center Number | Atomic Number | Atomic Type | Coordinates (Angstroms) |           |           |
|---------------|---------------|-------------|-------------------------|-----------|-----------|
|               |               |             | X                       | Y         | Z         |
| 1             | 7             | 0           | 3.686406                | -1.476711 | 0.083910  |
| 2             | 6             | 0           | 4.042154                | -0.149283 | 0.126794  |
| 3             | 6             | 0           | 2.971282                | 0.589638  | -0.396520 |
| 4             | 6             | 0           | 1.960289                | -0.366161 | -0.743921 |
| 5             | 6             | 0           | 2.417042                | -1.643826 | -0.416542 |
| 6             | 6             | 0           | -1.522792               | -4.192877 | 0.266981  |
| 7             | 6             | 0           | -0.232968               | -4.449406 | -0.057389 |
| 8             | 6             | 0           | 0.470595                | -3.186919 | -0.225098 |
| 9             | 7             | 0           | -0.495070               | -2.209493 | -0.056277 |
| 10            | 6             | 0           | -1.736726               | -2.753906 | 0.265087  |
| 11            | 6             | 0           | 1.814557                | -2.971710 | -0.429162 |
| 12            | 7             | 0           | -3.686373               | 1.476699  | -0.083989 |
| 13            | 6             | 0           | -4.042117               | 0.149270  | -0.126891 |
| 14            | 6             | 0           | -2.971262               | -0.589653 | 0.396456  |
| 15            | 6             | 0           | -1.960267               | 0.366143  | 0.743861  |
| 16            | 6             | 0           | -2.417018               | 1.643810  | 0.416488  |
| 17            | 6             | 0           | -2.895122               | -2.052904 | 0.492369  |
| 18            | 6             | 0           | 1.522833                | 4.192863  | -0.266939 |
| 19            | 6             | 0           | 0.233013                | 4.449396  | 0.057443  |

|    |    |   |           |           |           |
|----|----|---|-----------|-----------|-----------|
| 20 | 6  | 0 | -0.470577 | 3.186912  | 0.225072  |
| 21 | 7  | 0 | 0.495078  | 2.209480  | 0.056220  |
| 22 | 6  | 0 | 1.736740  | 2.753890  | -0.265122 |
| 23 | 6  | 0 | 2.895132  | 2.052891  | -0.492420 |
| 24 | 6  | 0 | -1.814543 | 2.971701  | 0.429129  |
| 25 | 16 | 0 | 5.615889  | 0.308858  | 0.783411  |
| 26 | 6  | 0 | 5.342389  | 0.208270  | 2.572206  |
| 27 | 16 | 0 | -5.615842 | -0.308869 | -0.783534 |
| 28 | 6  | 0 | -4.132996 | -2.807006 | 0.819465  |
| 29 | 6  | 0 | -5.342336 | -0.208207 | -2.572324 |
| 30 | 6  | 0 | -2.739792 | 4.129931  | 0.547607  |
| 31 | 6  | 0 | 4.133000  | 2.807006  | -0.819494 |
| 32 | 6  | 0 | 2.739788  | -4.129960 | -0.547573 |
| 33 | 6  | 0 | -4.580090 | -1.178272 | -3.234684 |
| 34 | 6  | 0 | -4.409991 | -1.096719 | -4.616576 |
| 35 | 6  | 0 | -5.011934 | -0.065827 | -5.341993 |
| 36 | 6  | 0 | -5.951883 | 0.821117  | -3.297700 |
| 37 | 6  | 0 | -4.820648 | -2.565471 | 2.017342  |
| 38 | 6  | 0 | -6.000895 | -3.225542 | 2.343965  |
| 39 | 6  | 0 | -6.527902 | -4.170729 | 1.466669  |
| 40 | 6  | 0 | -5.871747 | -4.439015 | 0.268535  |
| 41 | 6  | 0 | -4.697412 | -3.758893 | -0.037899 |
| 42 | 6  | 0 | 2.903390  | -5.089434 | 0.462937  |
| 43 | 6  | 0 | 3.783192  | -6.162651 | 0.336372  |
| 44 | 6  | 0 | 4.554889  | -6.289755 | -0.815165 |
| 45 | 6  | 0 | 4.434455  | -5.346505 | -1.834213 |
| 46 | 6  | 0 | 3.538137  | -4.291819 | -1.692210 |
| 47 | 6  | 0 | -3.538027 | 4.291780  | 1.692327  |
| 48 | 6  | 0 | -4.434368 | 5.346435  | 1.834411  |
| 49 | 6  | 0 | -4.554955 | 6.289660  | 0.815358  |
| 50 | 6  | 0 | -3.783391 | 6.162555  | -0.336267 |
| 51 | 6  | 0 | -2.903561 | 5.089370  | -0.462910 |
| 52 | 6  | 0 | 4.697331  | 3.758974  | 0.037834  |
| 53 | 6  | 0 | 5.871659  | 4.439117  | -0.268578 |
| 54 | 6  | 0 | 6.527893  | 4.170772  | -1.466655 |
| 55 | 6  | 0 | 6.000967  | 3.225510  | -2.343920 |
| 56 | 6  | 0 | 4.820722  | 2.565423  | -2.017321 |
| 57 | 6  | 0 | 4.580229  | 1.178416  | 3.234544  |
| 58 | 6  | 0 | 4.410139  | 1.096919  | 4.616441  |
| 59 | 6  | 0 | 5.012006  | 0.066001  | 5.341883  |
| 60 | 6  | 0 | 5.787950  | -0.887735 | 4.682826  |
| 61 | 6  | 0 | 5.951863  | -0.821080 | 3.297607  |
| 62 | 9  | 0 | -4.337651 | -1.675095 | 2.894809  |
| 63 | 9  | 0 | -6.620008 | -2.975485 | 3.503414  |

|     |   |   |           |           |           |
|-----|---|---|-----------|-----------|-----------|
| 64  | 9 | 0 | -7.654803 | -4.818343 | 1.775181  |
| 65  | 9 | 0 | -6.379753 | -5.335675 | -0.585761 |
| 66  | 9 | 0 | -4.124646 | -4.017611 | -1.229558 |
| 67  | 9 | 0 | -2.204087 | 4.994496  | -1.604373 |
| 68  | 9 | 0 | -3.905992 | 7.057079  | -1.323818 |
| 69  | 9 | 0 | -5.406800 | 7.309486  | 0.942934  |
| 70  | 9 | 0 | -5.167834 | 5.470034  | 2.945560  |
| 71  | 9 | 0 | -3.440165 | 3.413298  | 2.697606  |
| 72  | 9 | 0 | 4.337803  | 1.674976  | -2.894760 |
| 73  | 9 | 0 | 4.124470  | 4.017767  | 1.229432  |
| 74  | 9 | 0 | 6.379581  | 5.335855  | 0.585685  |
| 75  | 9 | 0 | 7.654790  | 4.818404  | -1.775146 |
| 76  | 9 | 0 | 6.620152  | 2.975397  | -3.503318 |
| 77  | 9 | 0 | 5.406705  | -7.309614 | -0.942668 |
| 78  | 9 | 0 | 2.203743  | -4.994581 | 1.604294  |
| 79  | 9 | 0 | 3.905630  | -7.057214 | 1.323907  |
| 80  | 9 | 0 | 3.440420  | -3.413312 | -2.697481 |
| 81  | 9 | 0 | 5.168040  | -5.470112 | -2.945282 |
| 82  | 6 | 0 | -5.787962 | 0.887826  | -4.682916 |
| 83  | 1 | 0 | 4.251811  | -2.213493 | 0.477514  |
| 84  | 1 | 0 | 1.070398  | -0.156507 | -1.322420 |
| 85  | 1 | 0 | -2.287024 | -4.920754 | 0.492397  |
| 86  | 1 | 0 | 0.226959  | -5.420884 | -0.155797 |
| 87  | 1 | 0 | -0.311140 | -1.222912 | -0.096565 |
| 88  | 1 | 0 | -4.251773 | 2.213485  | -0.477592 |
| 89  | 1 | 0 | -1.070383 | 0.156488  | 1.322371  |
| 90  | 1 | 0 | 2.287082  | 4.920737  | -0.492306 |
| 91  | 1 | 0 | -0.226891 | 5.420878  | 0.155908  |
| 92  | 1 | 0 | 0.311136  | 1.222900  | 0.096484  |
| 93  | 1 | 0 | -6.553951 | 1.561389  | -2.779885 |
| 94  | 1 | 0 | -6.263023 | 1.687660  | -5.243345 |
| 95  | 1 | 0 | -4.881190 | -0.010592 | -6.418577 |
| 96  | 1 | 0 | -3.815419 | -1.847455 | -5.128795 |
| 97  | 1 | 0 | -4.136998 | -1.993951 | -2.674056 |
| 98  | 1 | 0 | 4.137200  | 1.994117  | 2.673898  |
| 99  | 1 | 0 | 3.815637  | 1.847722  | 5.128643  |
| 100 | 1 | 0 | 4.881272  | 0.010809  | 6.418470  |
| 101 | 1 | 0 | 6.262948  | -1.687593 | 5.243274  |
| 102 | 1 | 0 | 6.553863  | -1.561417 | 2.779807  |

---

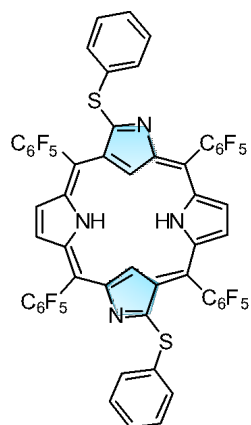

**3**

Stoichiometry C<sub>56</sub>H<sub>18</sub>F<sub>20</sub>N<sub>4</sub>S<sub>2</sub>

Framework group C1[X(C<sub>56</sub>H<sub>18</sub>F<sub>20</sub>N<sub>4</sub>S<sub>2</sub>)]

Deg. of freedom 294

Full point group C1 NOp 1

Largest Abelian subgroup C1 NOp 1

Largest concise Abelian subgroup C1 NOp 1

Standard orientation:

| Center Number | Atomic Number | Atomic Type | Coordinates (Angstroms) |           |           |
|---------------|---------------|-------------|-------------------------|-----------|-----------|
|               |               |             | X                       | Y         | Z         |
| 1             | 7             | 0           | 4.120151                | 0.616036  | 0.007894  |
| 2             | 6             | 0           | 4.118568                | -0.685131 | -0.020082 |
| 3             | 6             | 0           | 2.763277                | -1.259372 | 0.243220  |
| 4             | 6             | 0           | 1.975984                | -0.108609 | 0.473672  |
| 5             | 6             | 0           | 2.810112                | 1.019131  | 0.306400  |
| 6             | 6             | 0           | -0.539484               | 4.380377  | 0.193629  |
| 7             | 6             | 0           | 0.821671                | 4.325150  | 0.365459  |
| 8             | 6             | 0           | 1.232158                | 2.956830  | 0.293041  |
| 9             | 7             | 0           | 0.076623                | 2.231687  | 0.099123  |
| 10            | 6             | 0           | -1.033221               | 3.046157  | 0.020595  |
| 11            | 6             | 0           | 2.527135                | 2.405741  | 0.335072  |
| 12            | 7             | 0           | -4.120072               | -0.616036 | -0.007875 |
| 13            | 6             | 0           | -4.118482               | 0.685132  | 0.020079  |
| 14            | 6             | 0           | -2.763159               | 1.259351  | -0.243069 |
| 15            | 6             | 0           | -1.975830               | 0.108585  | -0.473385 |
| 16            | 6             | 0           | -2.810008               | -1.019143 | -0.306260 |
| 17            | 6             | 0           | -2.364921               | 2.613858  | -0.133670 |
| 18            | 6             | 0           | 0.539570                | -4.380381 | -0.193498 |
| 19            | 6             | 0           | -0.821581               | -4.325165 | -0.365362 |
| 20            | 6             | 0           | -1.232083               | -2.956854 | -0.292895 |
| 21            | 7             | 0           | -0.076549               | -2.231698 | -0.099013 |

|    |    |   |           |           |           |
|----|----|---|-----------|-----------|-----------|
| 22 | 6  | 0 | 1.033299  | -3.046160 | -0.020456 |
| 23 | 6  | 0 | 2.365005  | -2.613875 | 0.133821  |
| 24 | 6  | 0 | -2.527057 | -2.405757 | -0.334933 |
| 25 | 16 | 0 | 5.582020  | -1.616436 | -0.368650 |
| 26 | 6  | 0 | 6.842817  | -0.352847 | -0.569437 |
| 27 | 16 | 0 | -5.581965 | 1.616480  | 0.368375  |
| 28 | 6  | 0 | -3.388253 | 3.702289  | -0.139244 |
| 29 | 6  | 0 | -6.842826 | 0.352931  | 0.568975  |
| 30 | 6  | 0 | -3.686908 | -3.337775 | -0.311533 |
| 31 | 6  | 0 | 3.388291  | -3.702348 | 0.139423  |
| 32 | 6  | 0 | 3.686958  | 3.337789  | 0.311616  |
| 33 | 6  | 0 | -7.609533 | 0.381456  | 1.737787  |
| 34 | 6  | 0 | -8.671754 | -0.512261 | 1.891834  |
| 35 | 6  | 0 | -8.955332 | -1.441398 | 0.891723  |
| 36 | 6  | 0 | -7.133580 | -0.568960 | -0.444108 |
| 37 | 6  | 0 | -4.047659 | 4.061703  | -1.320197 |
| 38 | 6  | 0 | -4.994593 | 5.080501  | -1.354173 |
| 39 | 6  | 0 | -5.301745 | 5.770445  | -0.183432 |
| 40 | 6  | 0 | -4.657300 | 5.442826  | 1.007502  |
| 41 | 6  | 0 | -3.712432 | 4.420931  | 1.016709  |
| 42 | 6  | 0 | 3.873580  | 4.271323  | -0.715976 |
| 43 | 6  | 0 | 4.987693  | 5.104928  | -0.770636 |
| 44 | 6  | 0 | 5.970737  | 5.004078  | 0.209128  |
| 45 | 6  | 0 | 5.820652  | 4.081468  | 1.240643  |
| 46 | 6  | 0 | 4.693664  | 3.269412  | 1.283938  |
| 47 | 6  | 0 | -4.693502 | -3.269441 | -1.283976 |
| 48 | 6  | 0 | -5.820534 | -4.081438 | -1.240737 |
| 49 | 6  | 0 | -5.970780 | -5.003950 | -0.209158 |
| 50 | 6  | 0 | -4.987859 | -5.104751 | 0.770734  |
| 51 | 6  | 0 | -3.873700 | -4.271204 | 0.716128  |
| 52 | 6  | 0 | 3.712516  | -4.420954 | -1.016540 |
| 53 | 6  | 0 | 4.657319  | -5.442908 | -1.007307 |
| 54 | 6  | 0 | 5.301641  | -5.770634 | 0.183665  |
| 55 | 6  | 0 | 4.994425  | -5.080743 | 1.354419  |
| 56 | 6  | 0 | 4.047561  | -4.061880 | 1.320417  |
| 57 | 6  | 0 | 7.609345  | -0.381312 | -1.738367 |
| 58 | 6  | 0 | 8.671521  | 0.512435  | -1.892543 |
| 59 | 6  | 0 | 8.955230  | 1.441541  | -0.892439 |
| 60 | 6  | 0 | 8.181572  | 1.471175  | 0.271327  |
| 61 | 6  | 0 | 7.133706  | 0.569008  | 0.443637  |
| 62 | 9  | 0 | -3.773543 | 3.415786  | -2.459679 |
| 63 | 9  | 0 | -5.605450 | 5.403589  | -2.498235 |
| 64 | 9  | 0 | -6.206900 | 6.750182  | -0.204010 |
| 65 | 9  | 0 | -4.950415 | 6.107949  | 2.130096  |



|     |   |   |           |           |           |
|-----|---|---|-----------|-----------|-----------|
| 66  | 9 | 0 | -3.114301 | 4.124550  | 2.177980  |
| 67  | 9 | 0 | -2.976222 | -4.375769 | 1.708052  |
| 68  | 9 | 0 | -5.127703 | -5.982540 | 1.770998  |
| 69  | 9 | 0 | -7.050929 | -5.787154 | -0.161522 |
| 70  | 9 | 0 | -6.773866 | -3.967295 | -2.177051 |
| 71  | 9 | 0 | -4.595987 | -2.400580 | -2.298428 |
| 72  | 9 | 0 | 3.773382  | -3.416015 | 2.459912  |
| 73  | 9 | 0 | 3.114499  | -4.124479 | -2.177845 |
| 74  | 9 | 0 | 4.950488  | -6.107991 | -2.129912 |
| 75  | 9 | 0 | 6.206731  | -6.750430 | 0.204268  |
| 76  | 9 | 0 | 5.605157  | -5.403938 | 2.498517  |
| 77  | 9 | 0 | 7.050841  | 5.787341  | 0.161440  |
| 78  | 9 | 0 | 2.975944  | 4.375972  | -1.707748 |
| 79  | 9 | 0 | 5.127370  | 5.982829  | -1.770827 |
| 80  | 9 | 0 | 4.596312  | 2.400439  | 2.298310  |
| 81  | 9 | 0 | 6.774094  | 3.967291  | 2.176842  |
| 82  | 6 | 0 | -8.181492 | -1.471095 | -0.271921 |
| 83  | 1 | 0 | 1.001706  | -0.096674 | 0.941783  |
| 84  | 1 | 0 | -1.153079 | 5.268161  | 0.185906  |
| 85  | 1 | 0 | 1.486152  | 5.157560  | 0.540606  |
| 86  | 1 | 0 | 0.061119  | 1.238731  | -0.036416 |
| 87  | 1 | 0 | -1.001475 | 0.096647  | -0.941346 |
| 88  | 1 | 0 | 1.153174  | -5.268159 | -0.185781 |
| 89  | 1 | 0 | -1.486050 | -5.157576 | -0.540541 |
| 90  | 1 | 0 | -0.061065 | -1.238739 | 0.036505  |
| 91  | 1 | 0 | -6.530615 | -0.597104 | -1.343703 |
| 92  | 1 | 0 | -8.387456 | -2.200613 | -1.049130 |
| 93  | 1 | 0 | -9.775458 | -2.142108 | 1.016814  |
| 94  | 1 | 0 | -9.267113 | -0.486155 | 2.799598  |
| 95  | 1 | 0 | -7.374508 | 1.094153  | 2.521849  |
| 96  | 1 | 0 | 7.374222  | -1.093996 | -2.522412 |
| 97  | 1 | 0 | 9.266747  | 0.486375  | -2.800395 |
| 98  | 1 | 0 | 9.775321  | 2.142274  | -1.017632 |
| 99  | 1 | 0 | 8.387640  | 2.200667  | 1.048532  |
| 100 | 1 | 0 | 6.530882  | 0.597099  | 1.343330  |

---

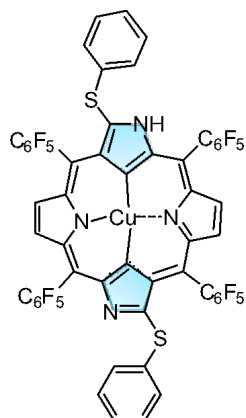

**4-Cu**

Stoichiometry C<sub>56</sub>H<sub>15</sub>CuF<sub>20</sub>N<sub>4</sub>S<sub>2</sub>  
 Framework group C1[X(C<sub>56</sub>H<sub>15</sub>CuF<sub>20</sub>N<sub>4</sub>S<sub>2</sub>)]  
 Deg. of freedom 288  
 Full point group C1 NOp 1  
 Largest Abelian subgroup C1 NOp 1  
 Largest concise Abelian subgroup C1 NOp 1

Standard orientation:

| Center Number | Atomic Number | Atomic Type | Coordinates (Angstroms) |           |           |
|---------------|---------------|-------------|-------------------------|-----------|-----------|
|               |               |             | X                       | Y         | Z         |
| 1             | 7             | 0           | -4.143209               | -0.523157 | -0.080341 |
| 2             | 6             | 0           | -4.162485               | 0.815137  | -0.135029 |
| 3             | 6             | 0           | -2.799251               | 1.259079  | -0.184331 |
| 4             | 6             | 0           | -1.962374               | 0.105499  | -0.156549 |
| 5             | 6             | 0           | -2.818228               | -0.986844 | -0.060290 |
| 6             | 6             | 0           | 0.512030                | -4.231307 | 0.006024  |
| 7             | 6             | 0           | -0.840784               | -4.179442 | 0.080029  |
| 8             | 6             | 0           | -1.216245               | -2.792784 | 0.055329  |
| 9             | 7             | 0           | -0.073898               | -1.994572 | 0.013549  |
| 10            | 6             | 0           | 0.993526                | -2.876601 | -0.035908 |
| 11            | 6             | 0           | -2.533963               | -2.354379 | 0.046500  |
| 12            | 7             | 0           | 4.189253                | 0.596828  | 0.042038  |
| 13            | 6             | 0           | 4.168553                | -0.696252 | -0.041377 |
| 14            | 6             | 0           | 2.770272                | -1.228203 | -0.108940 |
| 15            | 6             | 0           | 1.946357                | -0.089637 | -0.117903 |
| 16            | 6             | 0           | 2.838552                | 1.000731  | 0.003146  |
| 17            | 6             | 0           | 2.353577                | -2.557242 | -0.093489 |
| 18            | 6             | 0           | -0.499866               | 4.246209  | -0.236269 |
| 19            | 6             | 0           | 0.850093                | 4.181240  | -0.134613 |
| 20            | 6             | 0           | 1.203063                | 2.792689  | -0.017042 |
| 21            | 7             | 0           | 0.072168                | 2.008341  | -0.033187 |

|    |    |   |           |           |           |
|----|----|---|-----------|-----------|-----------|
| 22 | 6  | 0 | -1.001254 | 2.898416  | -0.171203 |
| 23 | 6  | 0 | -2.350420 | 2.595682  | -0.227570 |
| 24 | 6  | 0 | 2.534262  | 2.350191  | 0.059513  |
| 25 | 16 | 0 | -5.664635 | 1.731793  | -0.084230 |
| 26 | 6  | 0 | -6.881663 | 0.429853  | 0.175283  |
| 27 | 16 | 0 | 5.640282  | -1.670749 | -0.090818 |
| 28 | 6  | 0 | 3.322170  | -3.693378 | -0.131428 |
| 29 | 6  | 0 | 6.956702  | -0.457354 | 0.046931  |
| 30 | 6  | 0 | 3.641889  | 3.337605  | 0.171201  |
| 31 | 6  | 0 | -3.316594 | 3.726954  | -0.348334 |
| 32 | 6  | 0 | -3.657984 | -3.327291 | 0.147660  |
| 33 | 6  | 0 | 7.927917  | -0.674513 | 1.030305  |
| 34 | 6  | 0 | 9.027159  | 0.182251  | 1.121258  |
| 35 | 6  | 0 | 9.146080  | 1.262683  | 0.247188  |
| 36 | 6  | 0 | 7.080576  | 0.617166  | -0.842737 |
| 37 | 6  | 0 | 3.828439  | -4.171433 | -1.344100 |
| 38 | 6  | 0 | 4.722949  | -5.236872 | -1.398601 |
| 39 | 6  | 0 | 5.127762  | -5.852495 | -0.216299 |
| 40 | 6  | 0 | 4.634030  | -5.405100 | 1.007429  |
| 41 | 6  | 0 | 3.739536  | -4.338827 | 1.036507  |
| 42 | 6  | 0 | -3.937115 | -4.258050 | -0.862963 |
| 43 | 6  | 0 | -5.002547 | -5.151629 | -0.772990 |
| 44 | 6  | 0 | -5.842047 | -5.116721 | 0.338610  |
| 45 | 6  | 0 | -5.603085 | -4.195116 | 1.354611  |
| 46 | 6  | 0 | -4.521425 | -3.324334 | 1.252597  |
| 47 | 6  | 0 | 4.627381  | 3.449880  | -0.816082 |
| 48 | 6  | 0 | 5.702817  | 4.322435  | -0.687422 |
| 49 | 6  | 0 | 5.811954  | 5.124725  | 0.445333  |
| 50 | 6  | 0 | 4.842255  | 5.046409  | 1.441195  |
| 51 | 6  | 0 | 3.780259  | 4.156928  | 1.296630  |
| 52 | 6  | 0 | -3.859153 | 4.085970  | -1.587127 |
| 53 | 6  | 0 | -4.752642 | 5.145533  | -1.719901 |
| 54 | 6  | 0 | -5.120858 | 5.876880  | -0.592443 |
| 55 | 6  | 0 | -4.594292 | 5.547447  | 0.655129  |
| 56 | 6  | 0 | -3.701450 | 4.484315  | 0.763592  |
| 57 | 6  | 0 | -7.827007 | 0.187000  | -0.829021 |
| 58 | 6  | 0 | -8.823078 | -0.770017 | -0.623447 |
| 59 | 6  | 0 | -8.862626 | -1.497359 | 0.567163  |
| 60 | 6  | 0 | -7.913820 | -1.259855 | 1.565853  |
| 61 | 6  | 0 | -6.932664 | -0.284550 | 1.382820  |
| 62 | 9  | 0 | 3.458659  | -3.596022 | -2.494683 |
| 63 | 9  | 0 | 5.192207  | -5.673686 | -2.572381 |
| 64 | 9  | 0 | 5.983752  | -6.876411 | -0.255825 |
| 65 | 9  | 0 | 5.019183  | -6.003409 | 2.140607  |

|    |    |   |           |           |           |
|----|----|---|-----------|-----------|-----------|
| 66 | 9  | 0 | 3.278351  | -3.931341 | 2.225953  |
| 67 | 9  | 0 | 2.876711  | 4.094755  | 2.286267  |
| 68 | 9  | 0 | 4.941860  | 5.814382  | 2.533197  |
| 69 | 9  | 0 | 6.839459  | 5.969277  | 0.572970  |
| 70 | 9  | 0 | 6.635959  | 4.395439  | -1.648652 |
| 71 | 9  | 0 | 4.555300  | 2.713244  | -1.932822 |
| 72 | 9  | 0 | -3.214249 | 4.188440  | 1.974076  |
| 73 | 9  | 0 | -3.524201 | 3.399236  | -2.686459 |
| 74 | 9  | 0 | -5.255530 | 5.466547  | -2.916545 |
| 75 | 9  | 0 | -5.975758 | 6.894848  | -0.707691 |
| 76 | 9  | 0 | -4.948903 | 6.251741  | 1.734634  |
| 77 | 9  | 0 | -6.875021 | -5.956558 | 0.425093  |
| 78 | 9  | 0 | -3.173048 | -4.307531 | -1.959812 |
| 79 | 9  | 0 | -5.237476 | -6.026419 | -1.755126 |
| 80 | 9  | 0 | -4.328197 | -2.449457 | 2.252973  |
| 81 | 9  | 0 | -6.414637 | -4.146349 | 2.419007  |
| 82 | 6  | 0 | 8.169263  | 1.480452  | -0.728752 |
| 83 | 1  | 0 | -4.970013 | -1.101741 | -0.050046 |
| 84 | 1  | 0 | 1.140272  | -5.108695 | -0.016109 |
| 85 | 1  | 0 | -1.530216 | -5.008252 | 0.136025  |
| 86 | 1  | 0 | -1.112398 | 5.127029  | -0.356835 |
| 87 | 1  | 0 | 1.558761  | 4.995247  | -0.159298 |
| 88 | 1  | 0 | 6.320408  | 0.793784  | -1.593141 |
| 89 | 1  | 0 | 8.245635  | 2.330217  | -1.400052 |
| 90 | 1  | 0 | 9.994942  | 1.935711  | 0.326226  |
| 91 | 1  | 0 | 9.780657  | 0.009202  | 1.884143  |
| 92 | 1  | 0 | 7.820962  | -1.504592 | 1.721682  |
| 93 | 1  | 0 | -7.779998 | 0.742326  | -1.760171 |
| 94 | 1  | 0 | -9.559218 | -0.953317 | -1.400186 |
| 95 | 1  | 0 | -9.631149 | -2.249246 | 0.718605  |
| 96 | 1  | 0 | -7.934846 | -1.832153 | 2.487588  |
| 97 | 1  | 0 | -6.204495 | -0.088157 | 2.163285  |
| 98 | 29 | 0 | -0.004022 | 0.004368  | -0.091809 |

---
